# Supplementary material for: BinSPreader: Refine binning results for fuller MAG reconstruction
Source: PubMed Central journal article supplement (PMC9386100; doi:10.1016/j.isci.2022.104770), 2022-07-19
Supplement: mmc1.pdf [file mmc1.pdf]

iScience, Volume 25

## **Supplemental information**

**BinSPreader: Refine binning results**

**for fuller MAG reconstruction**

**Ivan Tolstoganov, Yuri Kamenev, Roman Kruglikov, Sofia Ochkalova, and Anton Korobeynikov**

# Supplementary materials to “BinSPreader: refine binning results for fuller MAG reconstruction“

July 11, 2022

## 1 Command lines

- Binnacle

```
minimap2 -ax sr <assembly.fasta> <pe_reads1.fq> <pe_reads2.fq> |  
samtools view -F 3584 -b -o - |  
samtools sort -o <alignment.bam>
```

```
MetaCarvel/run.py -a <assembly.fasta> -m <alignment.bam> -d <metacarvel_output>  
-k true -r true
```

```
binnacle/src/Estimate_Abundances.py -g <metacarvel_output/oriented.gml>  
-bam <alignment.bam> -c <assembly.fasta> -d <binnacle_output>
```

```
binnacle/src/Collate.py -d <binnacle_output> -m metabat
```

```
metabat2 -i <binnacle_output>/Scaffolds.fasta -o <binnacle_output>/bins>  
-a <binnacle_output>/Feature-Matrix-metabat.txt> --seed 42
```

- BinSPreader

```
bin-refine <assembly_graph.gfa> <initial_binning.tsv> <output> -Rcorr -Smle
```

- BinSPreader-PE and BinSPreader-HiC

```
bin-refine <assembly_graph.gfa> <initial_binning.tsv> <output>  
--dataset <paired-end or Hi-C library.yaml> -Rcorr -Smle
```

- BinSPreader-Multiple

```
bin-refine <assembly_graph.gfa> <initial_binning.tsv> <output> -Rcorr -Smle -m
```

- DASTool

```
DAS_Tool -i <initial_binning.tsv> -o <dastool_output>  
--search_engine diamond -c <assembly.fasta> --write_bins
```

- MetaBAT2

```
minimap2 -ax sr <assembly.fasta> <pe_reads1.fq> <pe_reads2.fq> |
samtools view -F 3584 -b -o - |
samtools sort -o <alignment.bam>

jgi_summarize_bam_contig_depths --outputDepth <jgi_abundancies> <alignment.bam>

metabat2 -i <assembly.fasta> -o <metabat_output>
-a <jgi_abundancies> --seed 42
```

- MetaCoAG

```
MetaCoAG --assembler SPAdes --graph <assembly_graph.gfa>
--abundance <abundance.tsv> --contigs <assembly.fasta>
--output <output> --paths <assembly.paths> --depth 10
```

- METAMVGL

```
minimap2 -ax sr <assembly.fasta> <pe_reads1.fq> <pe_reads2.fq> |
samtools view -F 3584 -b -o - |
samtools sort -o <alignment.bam>

METAMVGL/prepResult.py --binned <initial_binning_output>
--assembler SPAdes --output <metamvgl_output>

METAMVGL/prep_graph --assembly-graph <assembly_graph.fastg>
--bam <alignment.bam> --assembler metaSPAdes
--output <scaffold_graph> --paths <assembly.paths>

METAMVGL.py --contigs <assembly.fasta> --assembler metaSPAdes
--assembly_graph <scaffold_graph.ag> --PE_graph <scaffold_graph.pe>
--binned <initial_binning.csv> --output <metamvgl_output/bins>
```

- MetaWRAP

```
metawrap binning -o <output> -a <assembly.fasta>
--metabat2 --maxbin2 --concoct
```

- VAMB

```
vamb --outdir <output> --fasta <assembly.fasta> --jgi <abundance.depth>
--minfasta 500000 -m 2000
```

## 2 Supplementary Figures

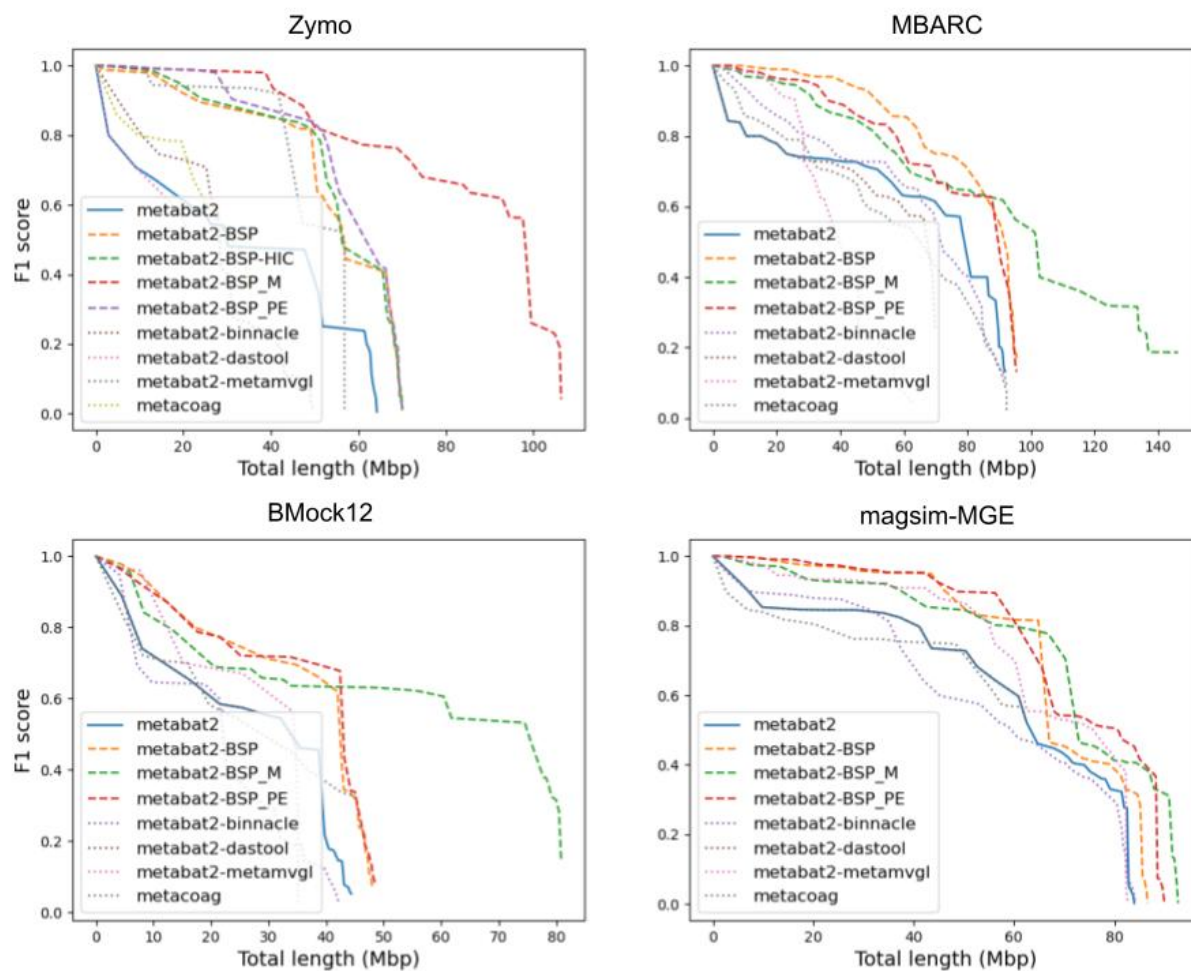

Supplementary Figure 1: F1 score and total length of MAGs for Zymo (top left), MBarc (top right), BMock12 (bottom left), and magsim-MGE (bottom right) datasets, arranged by descending order of F1 (seq) score reported by AMBER, related to Figure 1. Initial binning was produced using metaBAT2 (solid line), refined binnings were produced using DAS\_TOOL, Binnacle, and METAMVGL (dotted lines), and three different modes of BINSREADER (dashed lines).

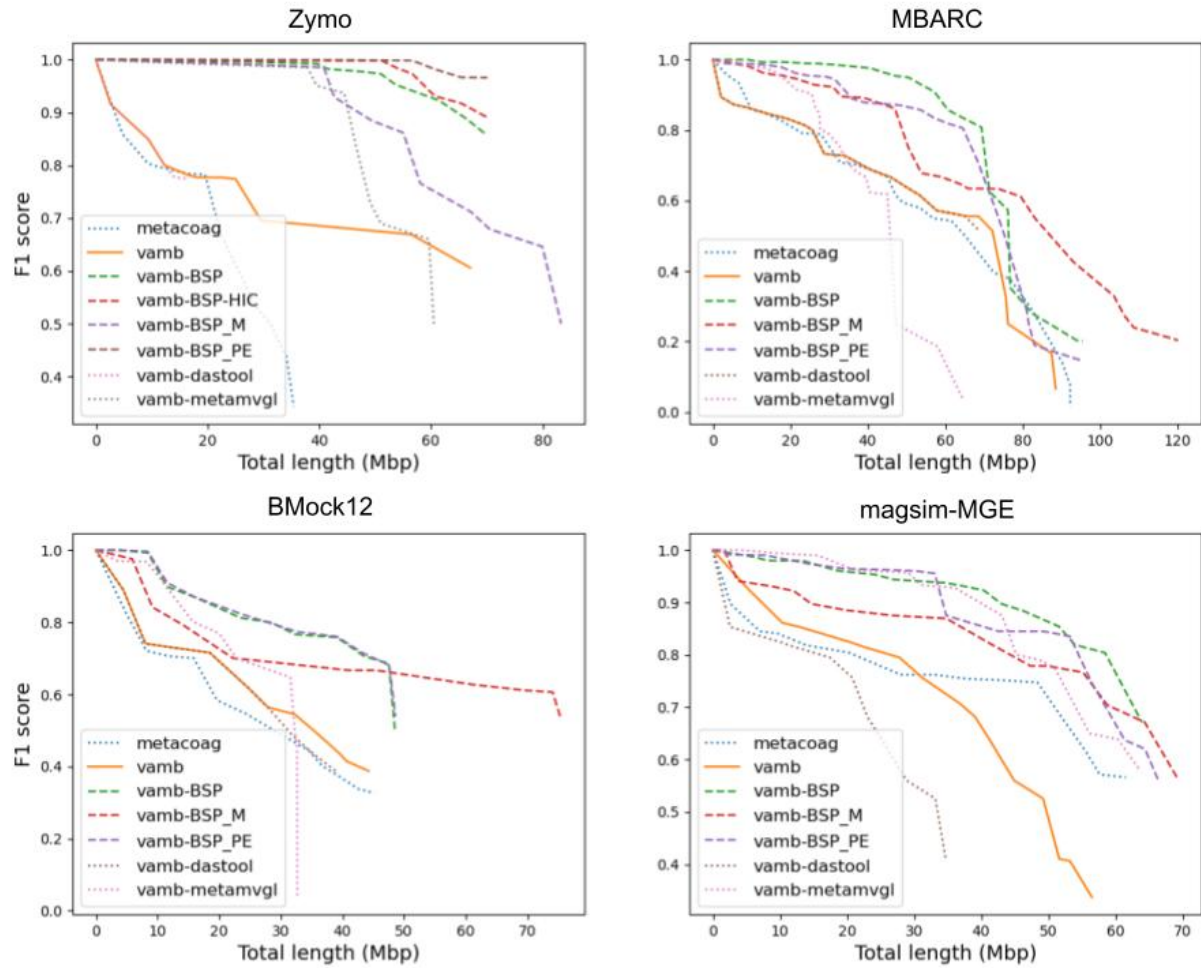

Supplementary Figure 2: F1 score and total length of MAGs for Zymo (top left), MBARC (top right), BMock12 (bottom left), and magsim-MGE (bottom right) datasets, arranged by descending order of F1 (seq) score reported by AMBER, related to Figure 1. Initial binning was produced using VAMB (solid line), refined binnings were produced using DAS\_TOOL and METAMVGL (dotted lines), and three different modes of BINSREADER (dashed lines).

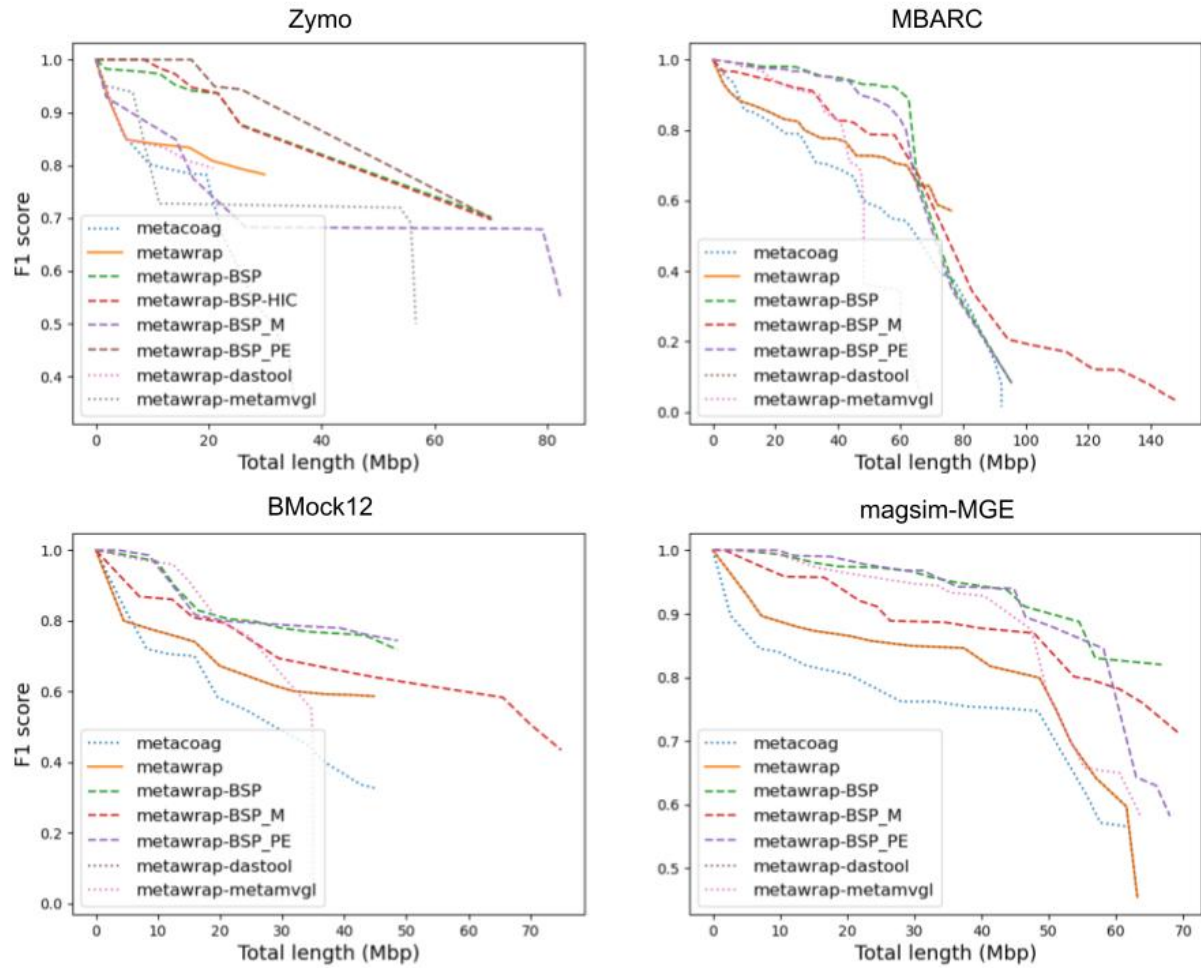

Supplementary Figure 3: F1 score and total length of MAGs for Zymo (top left), MBARC (top right), BMock12 (bottom left), and magsim-MGE (bottom right) datasets, arranged by descending order of F1 (seq) score reported by AMBER, related to Figure 1. Initial binning was produced using MetaWRAP (solid line), refined binnings were produced using DAS\_TOOL and METAMVGL (dotted lines), and three different modes of BINSREADER (dashed lines).

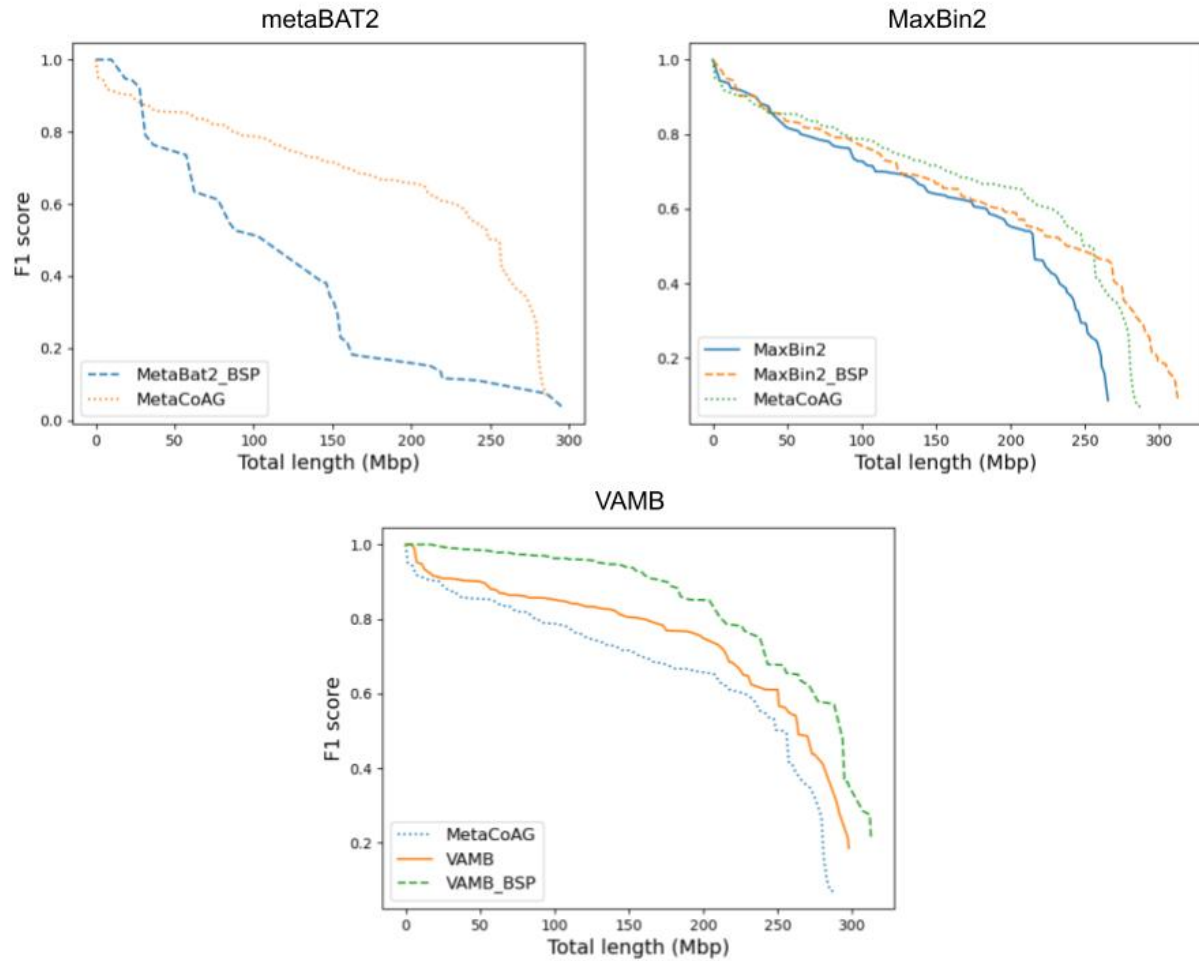

Supplementary Figure 4: F1 score and total length of MAGs for simHC+ dataset, arranged by descending order of F1 (seq) score reported by AMBER, related to Figure 1. Initial binning was produced using MetaWRAP (top left), MaxBin2 (top right), and VAMB (bottom). Refined binnings were produced using BINSREADER (dashed line) and MetaCoAG (dotted line).

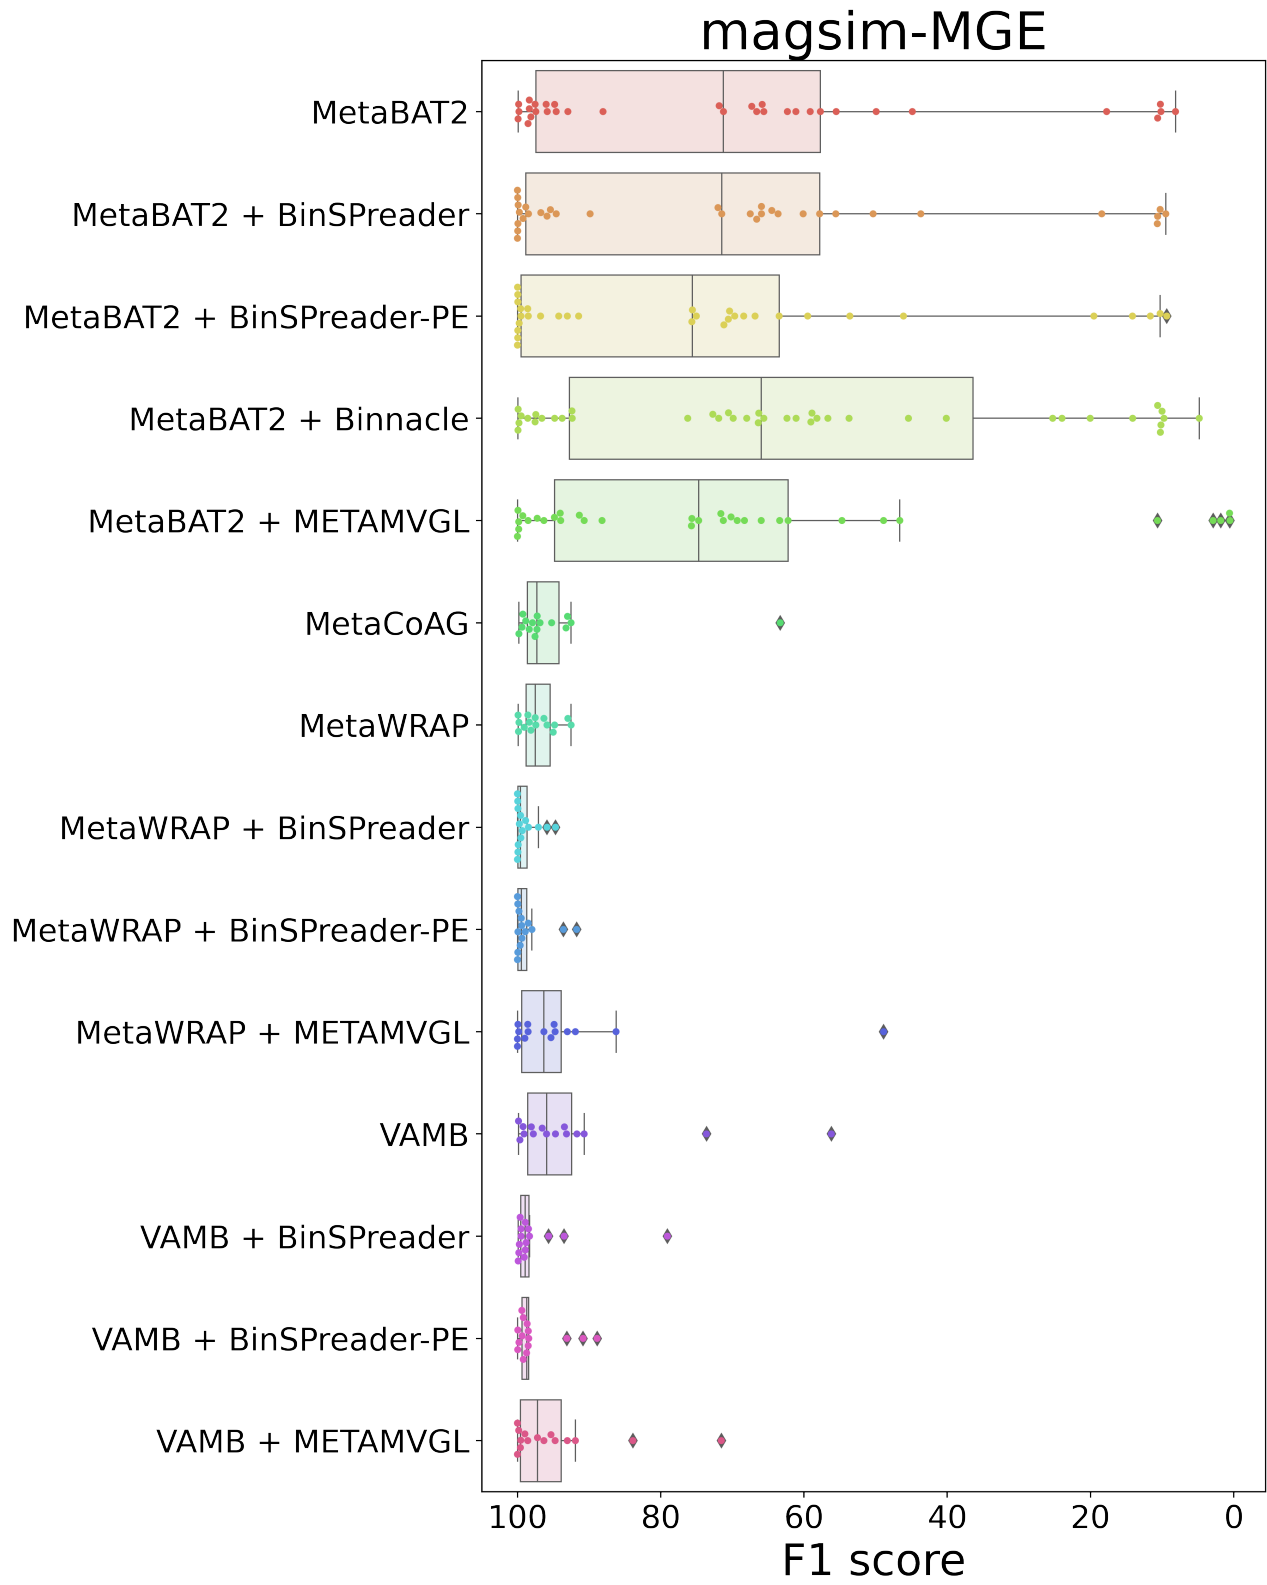

Supplementary Figure 5: F1 score distributions of **magsim-MGE** bins, related to Figure 1.



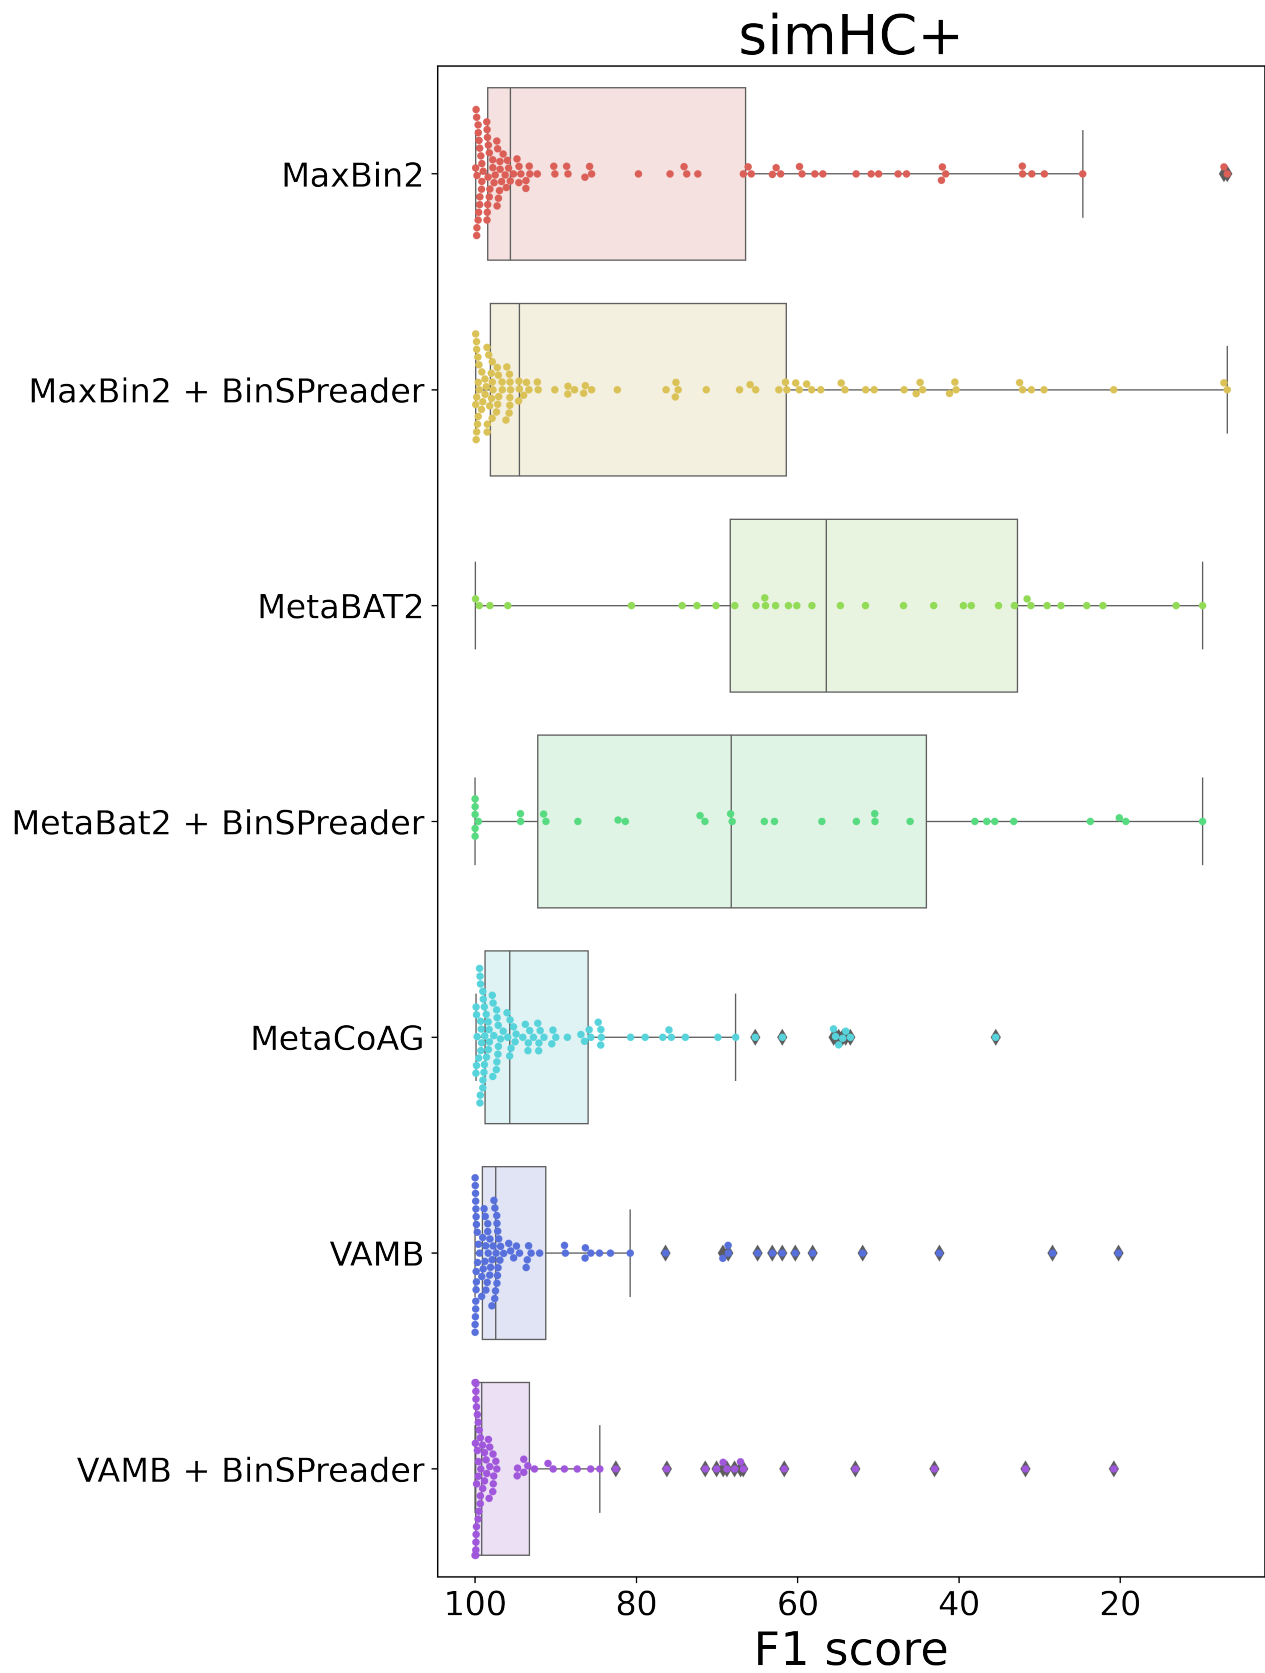

Supplementary Figure 6: F1 score distributions of **simHC+** bins, related to Figure 1.

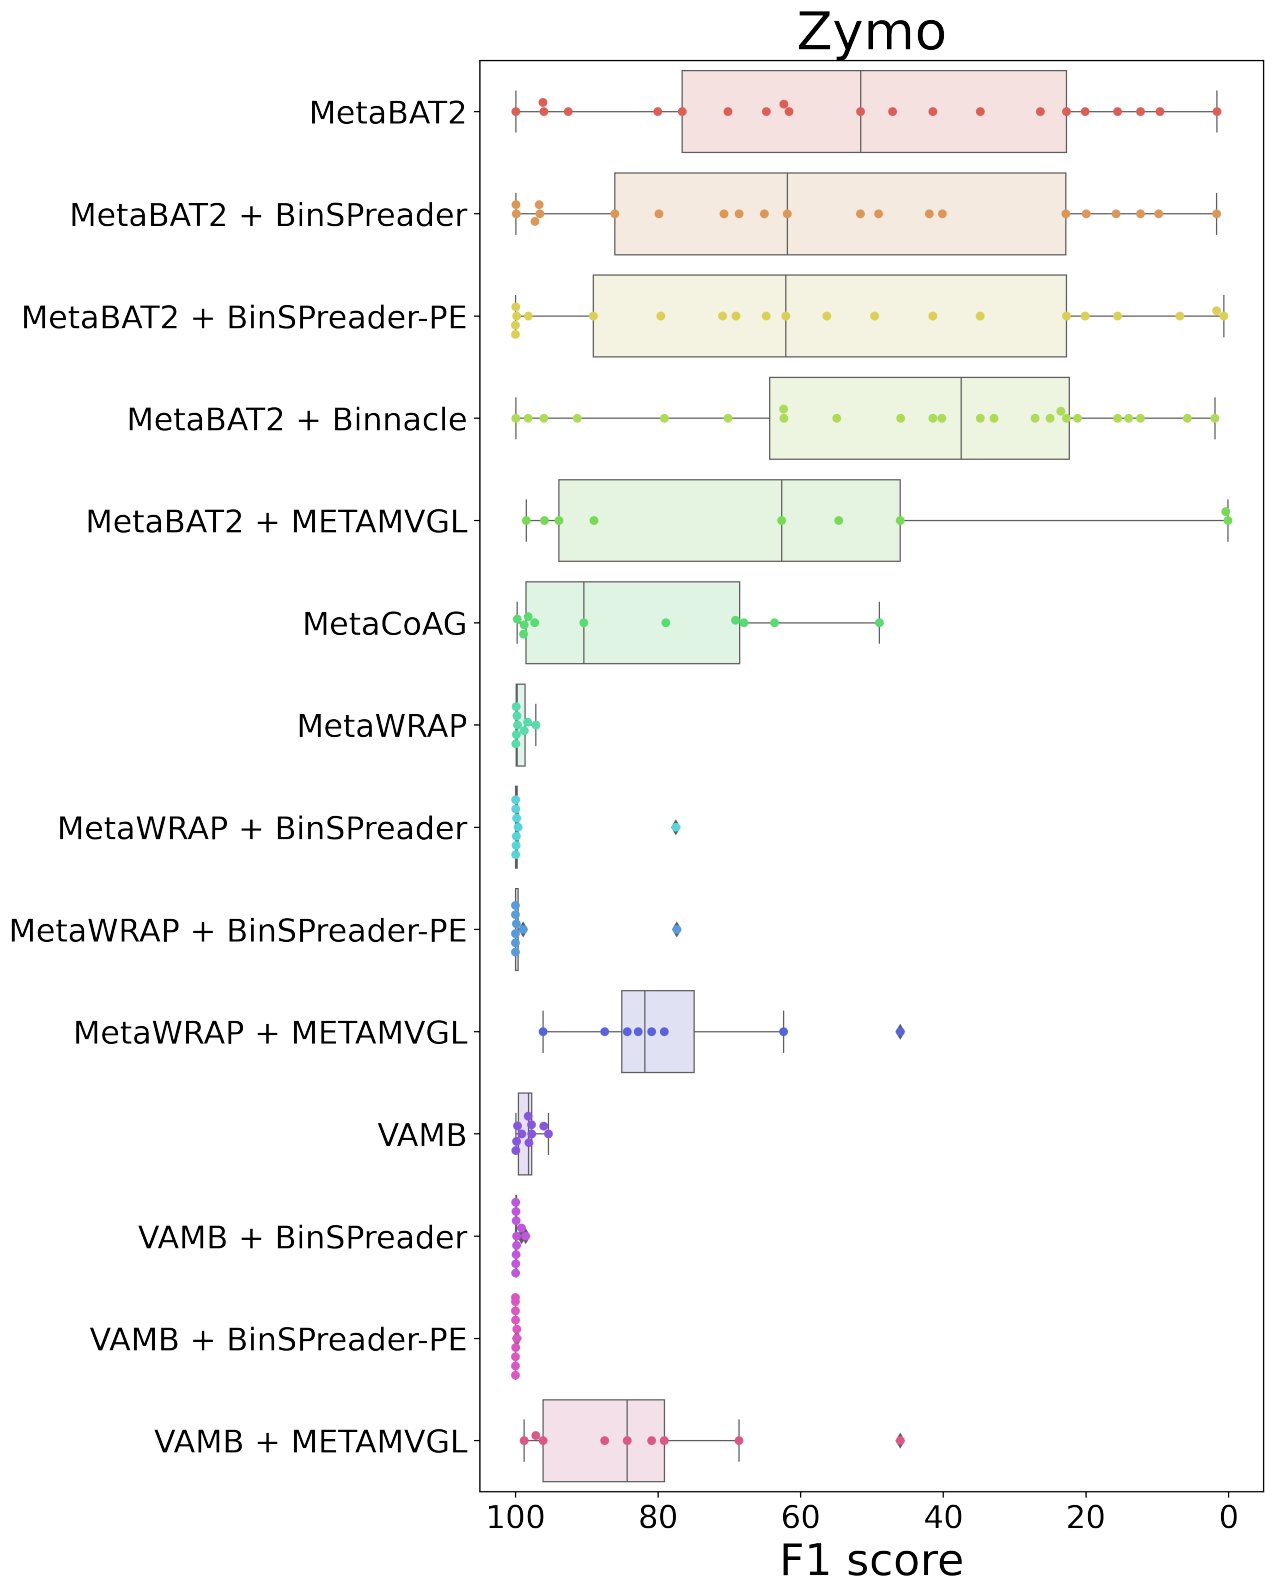

Supplementary Figure 7: F1 score distributions of **Zymo** dataset, related to Figure 1.

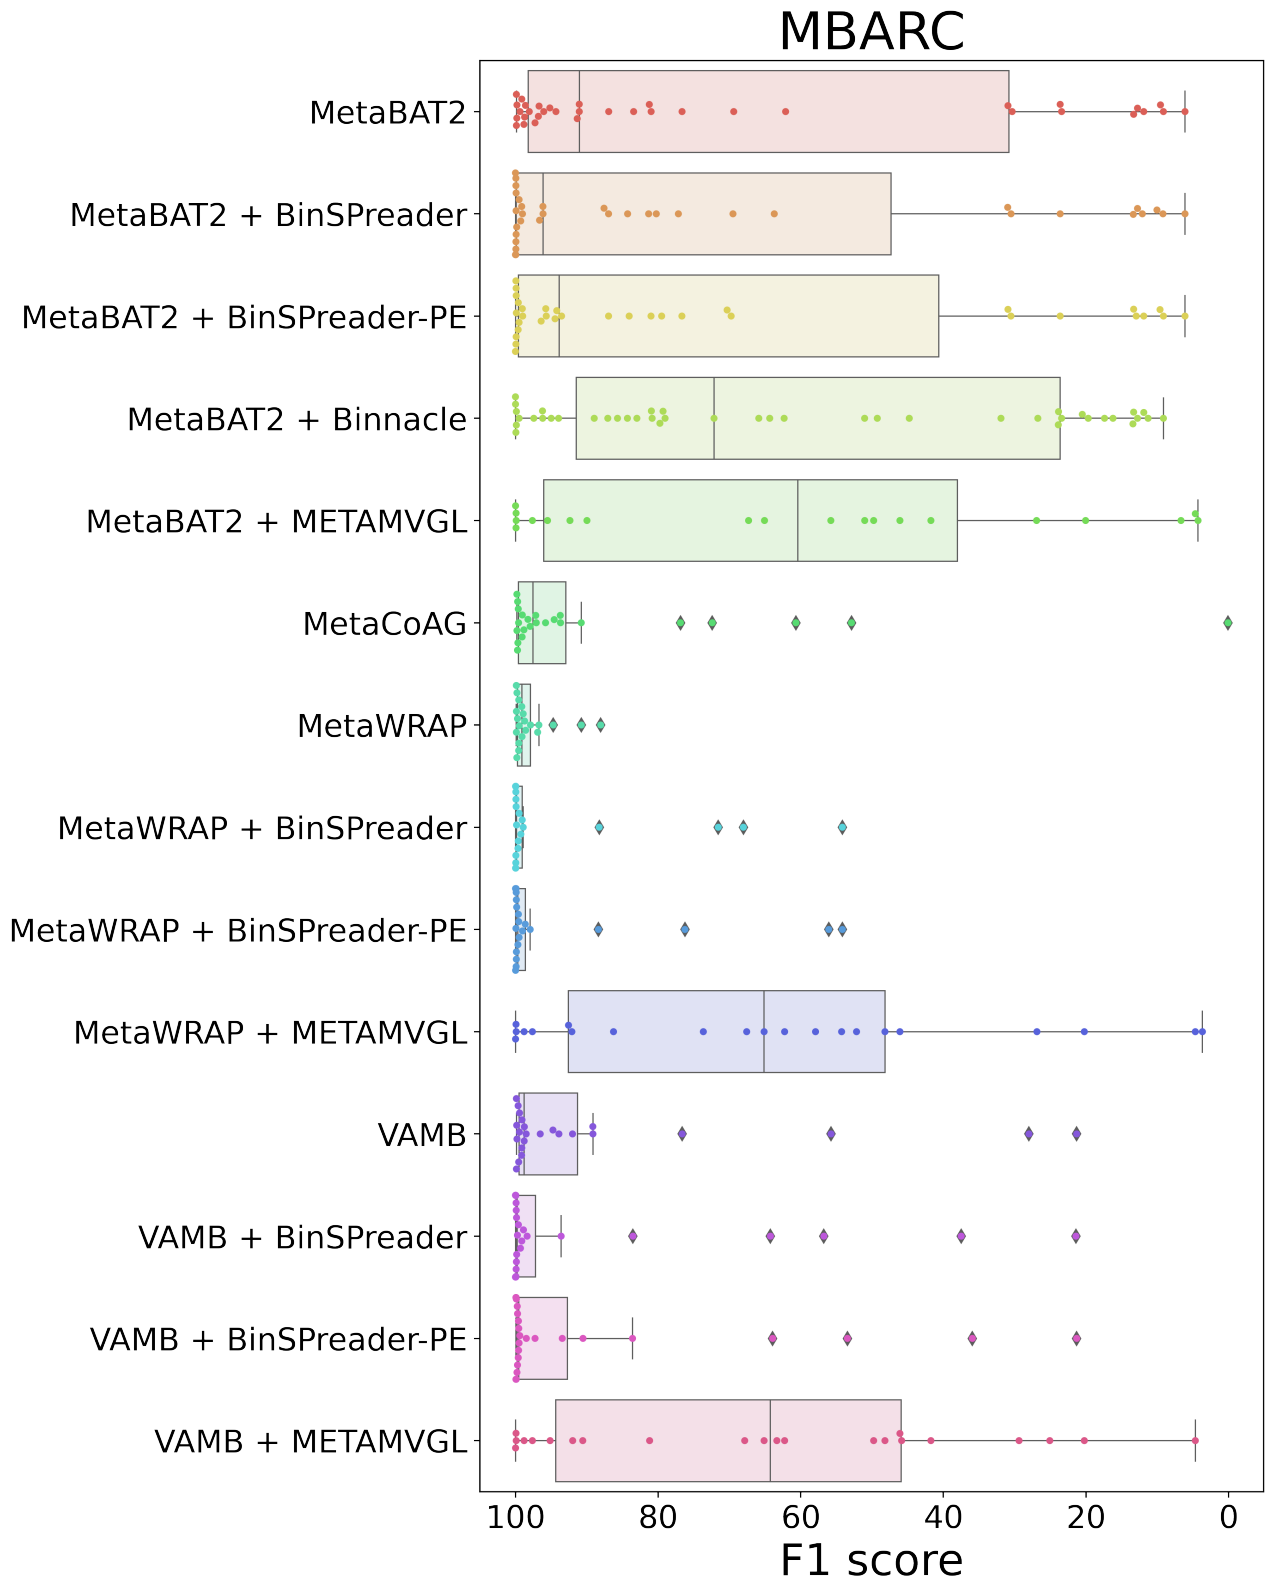

Supplementary Figure 8: F1 score distributions of **M<sub>BARC</sub>26** bins, related to Figure 1.

# BMock12

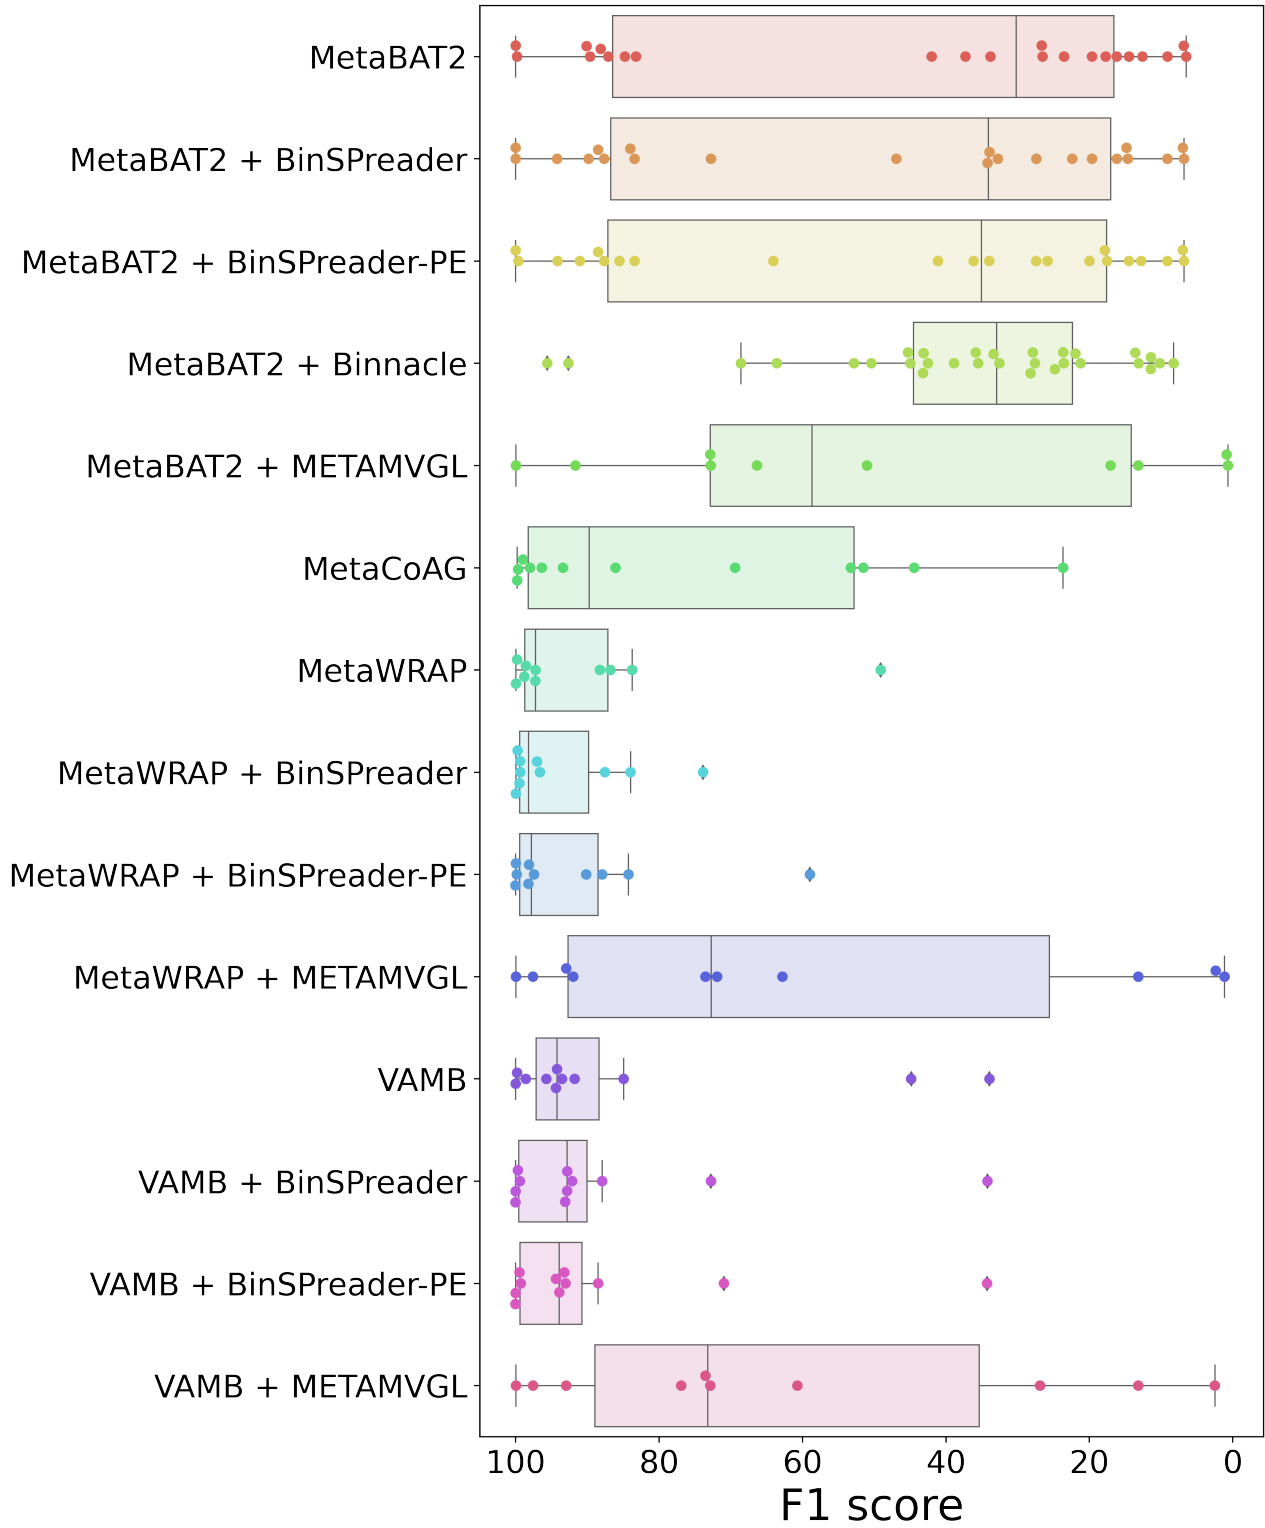

Supplementary Figure 9: F1 score distributions of **BMock12** bins, related to Figure 1.

# IC9

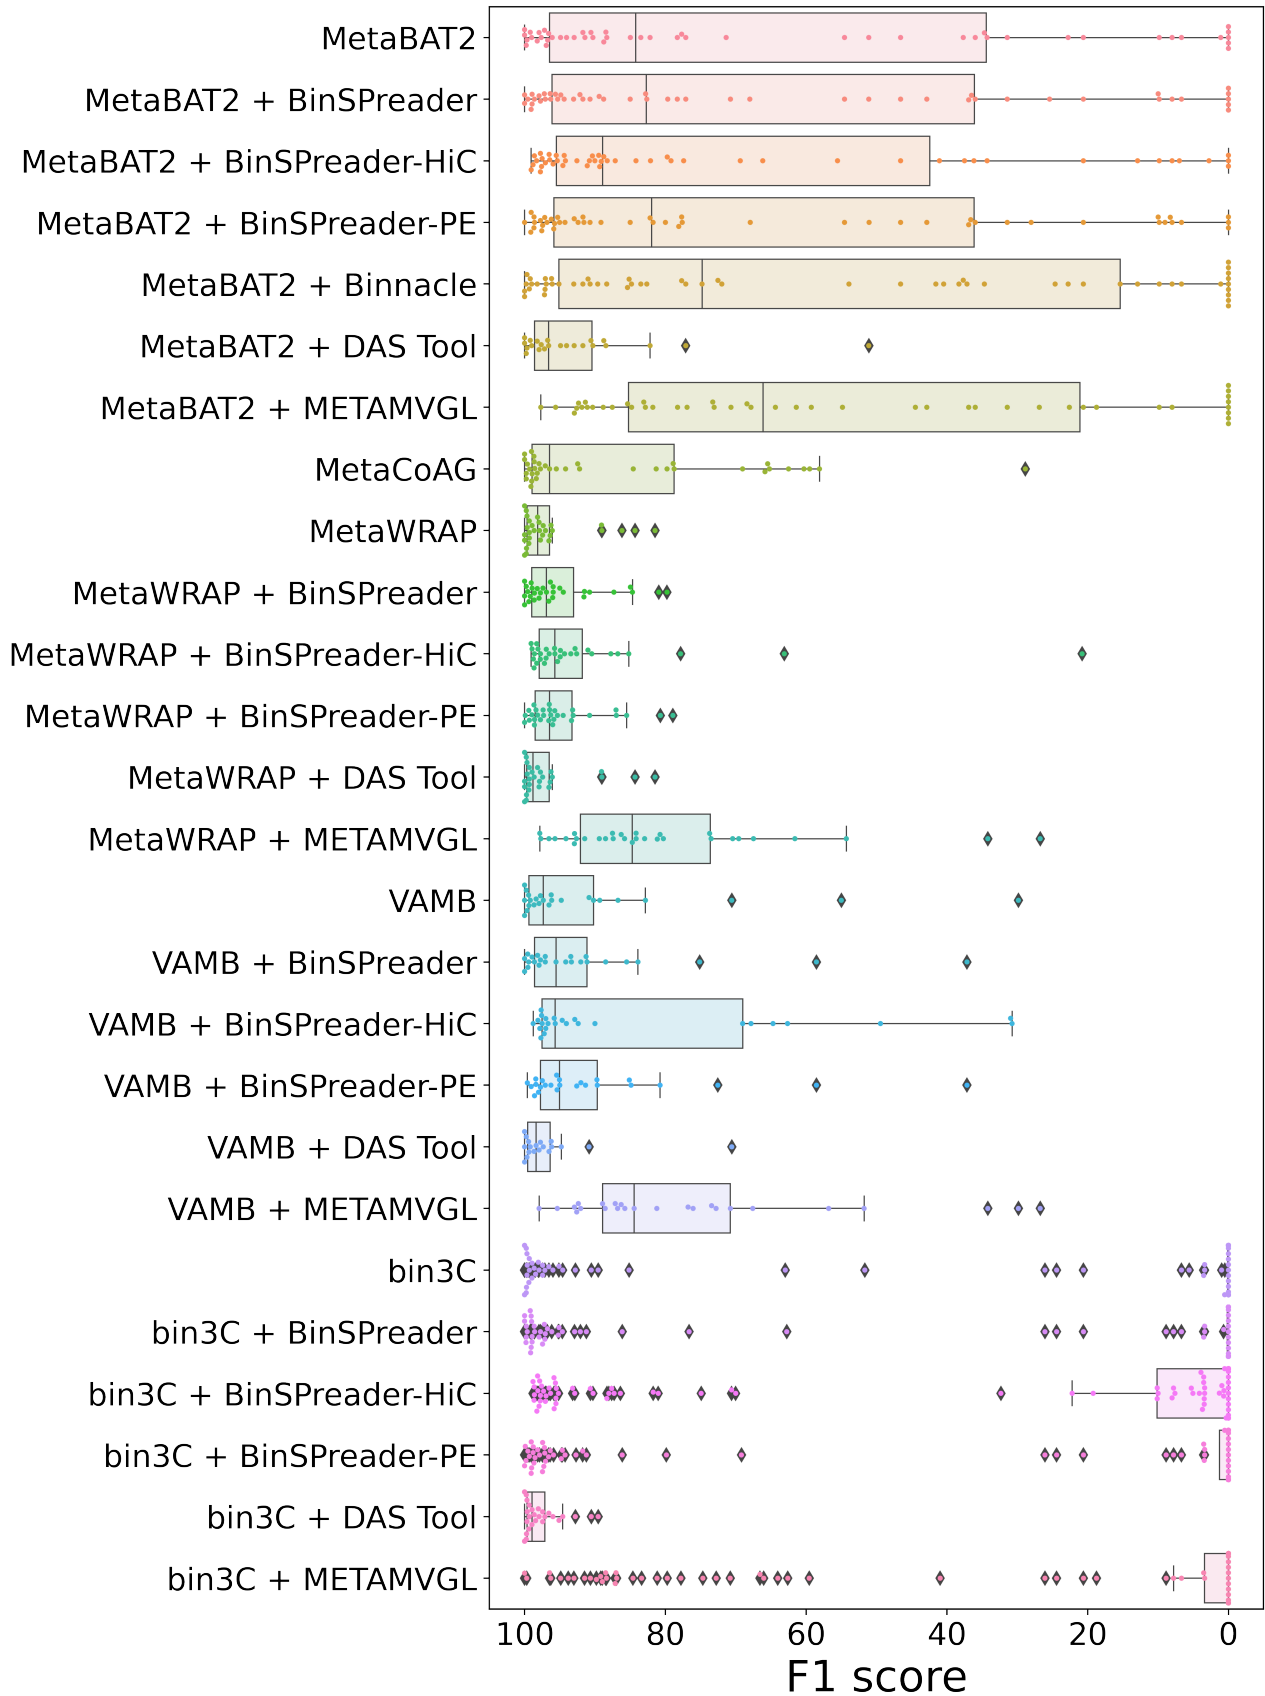

Supplementary Figure 10: F1 score distributions of **IC9** bins, related to Figure 1.

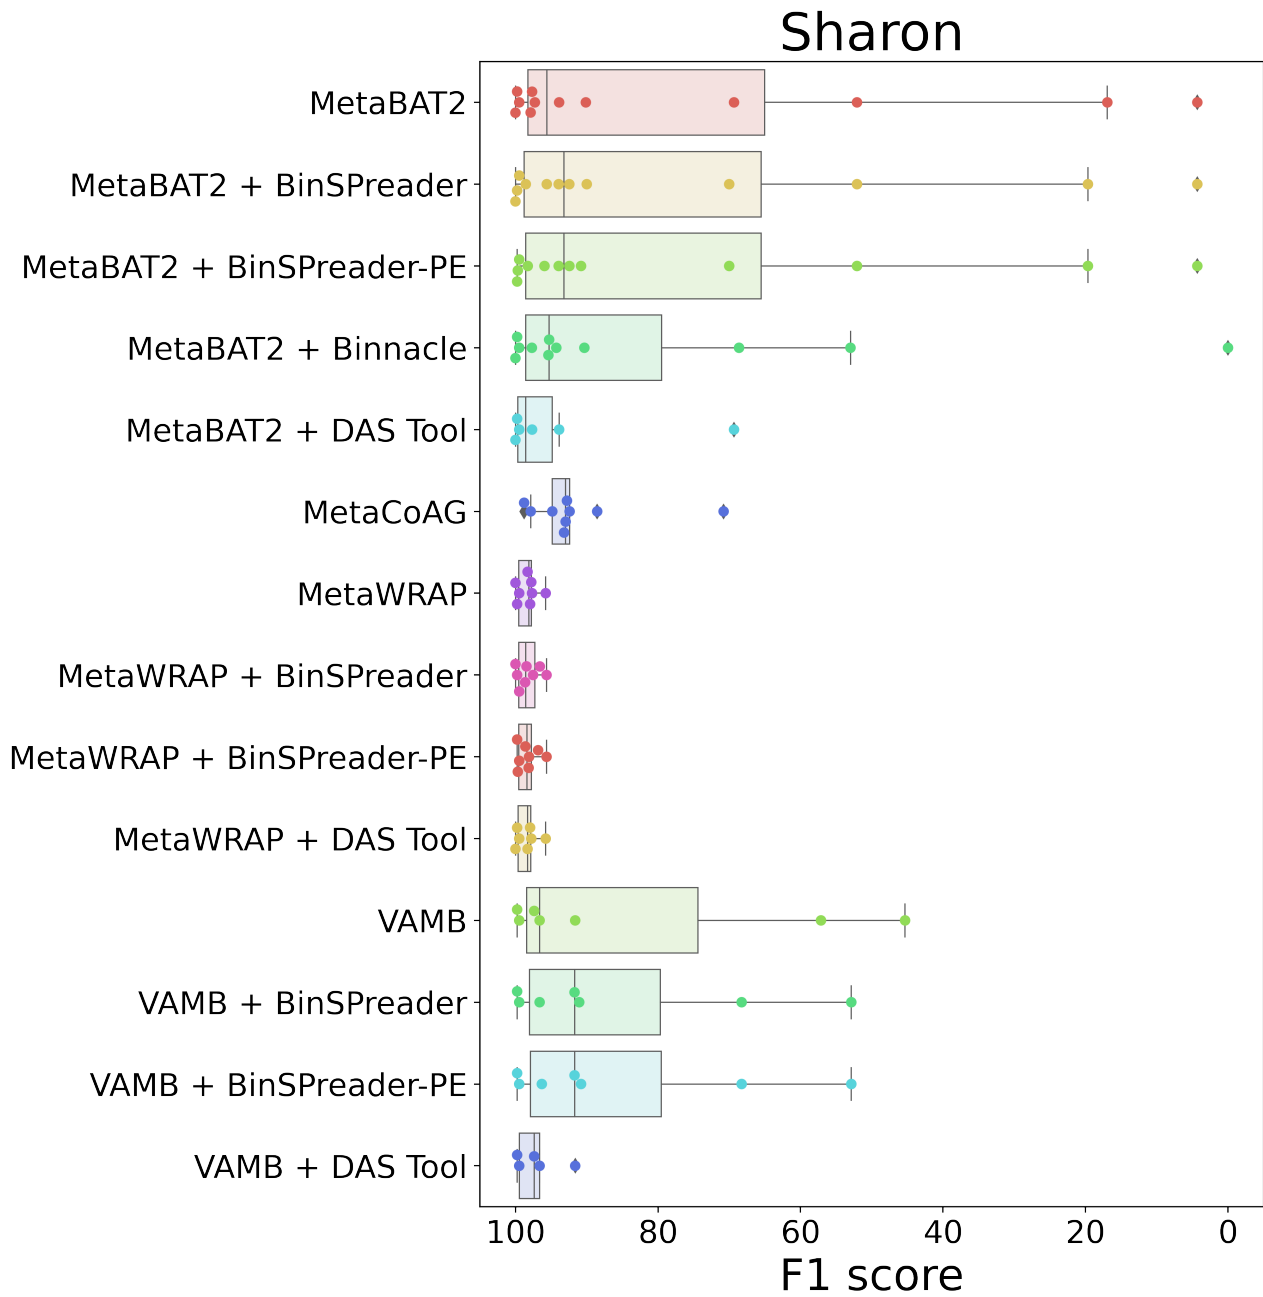

Supplementary Figure 11: F1 score distributions of **Sharon** bins, related to Figure 1.

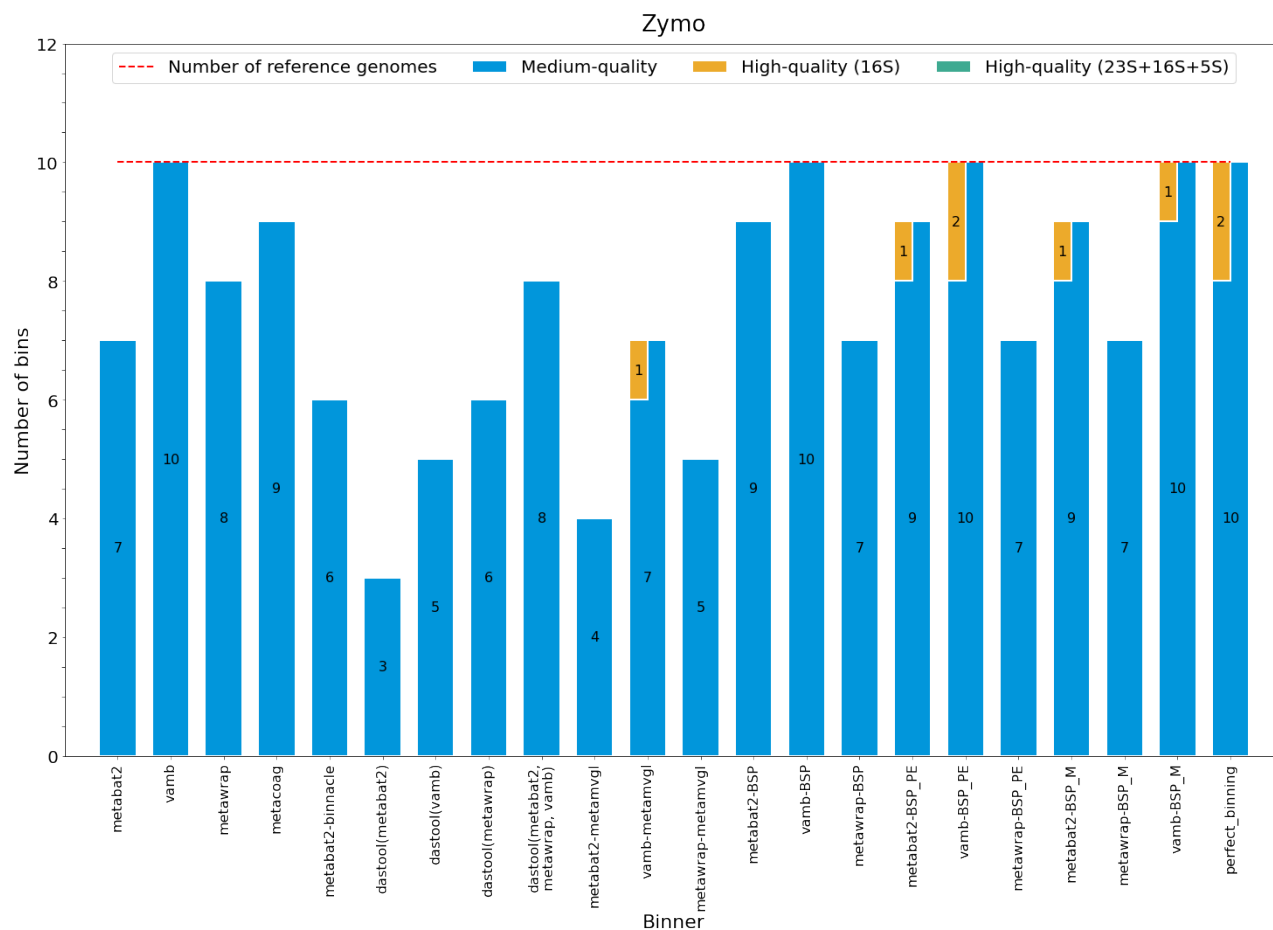

Supplementary Figure 12: MIMAG for **Zymo** dataset. BSP denotes refining with BINSREADER in default mode, BSP\_M denotes BINSREADER with multiple binning and BSP\_PE denotes BINSREADER with the usage of supplementary paired-end connectivity information, related to Figure 1. perfect\_binning – MAGs constructed from assembly having 100% purity and completeness. High-quality MAGs are divided into MAGs containing at least 16S/18S (orange bars) and MAGs with complete set of rRNA (green bars). Dashed line indicates number of reference genomes in dataset.

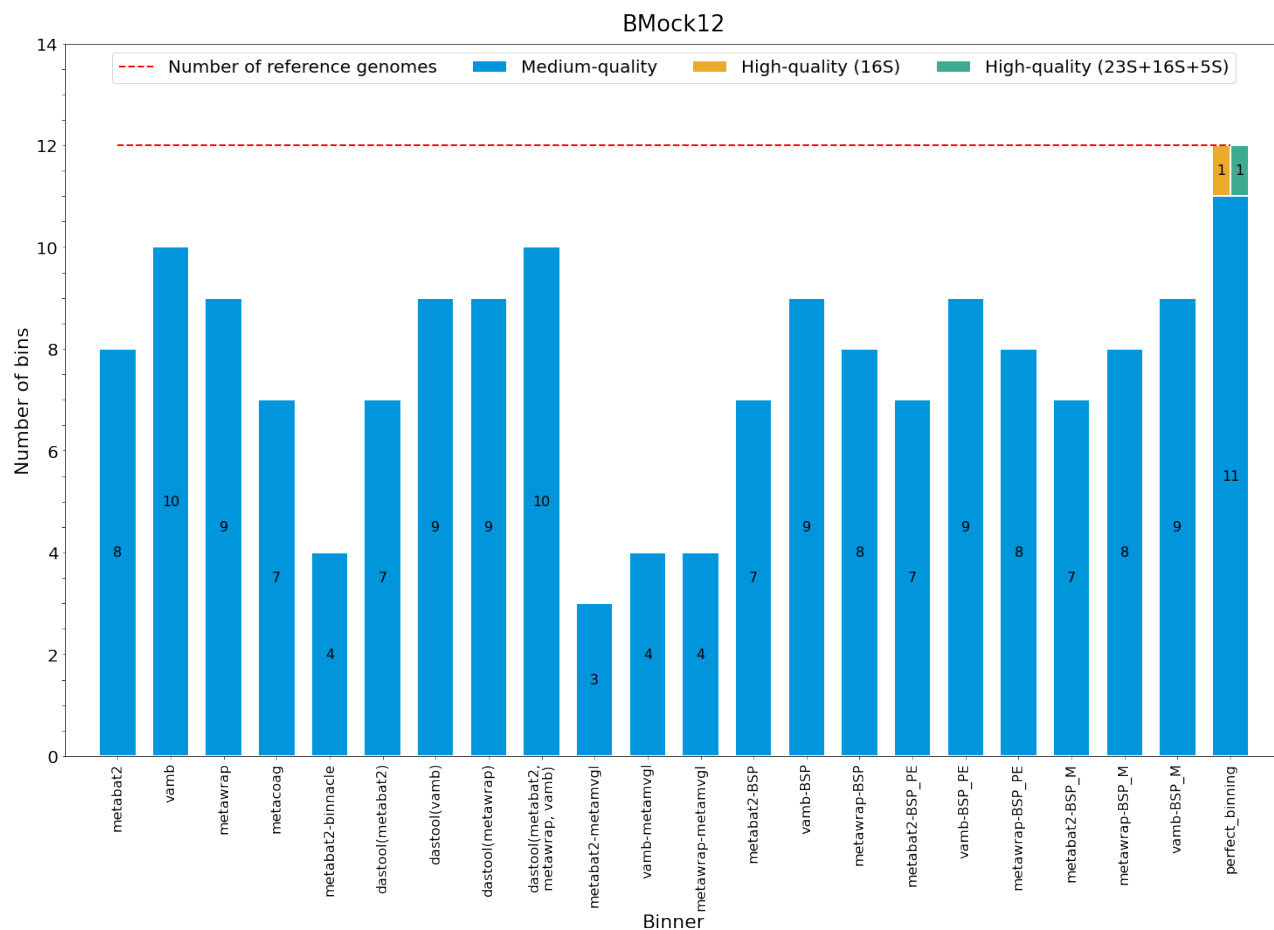

Supplementary Figure 13: MIMAG for **BMock12** dataset. BSP denotes refining with BINSREADER in default mode, BSP\_M denotes BINSREADER with multiple binning and BSP\_PE denotes BINSREADER with the usage of supplementary paired-end connectivity information, related to Figure 1. perfect\_binning – MAGs constructed from assembly having 100% purity and completeness. High-quality MAGs are divided into MAGs containing at least 16S/18S (orange bars) and MAGs with complete set of rRNA (green bars). Dashed line indicates number of reference genomes in dataset.



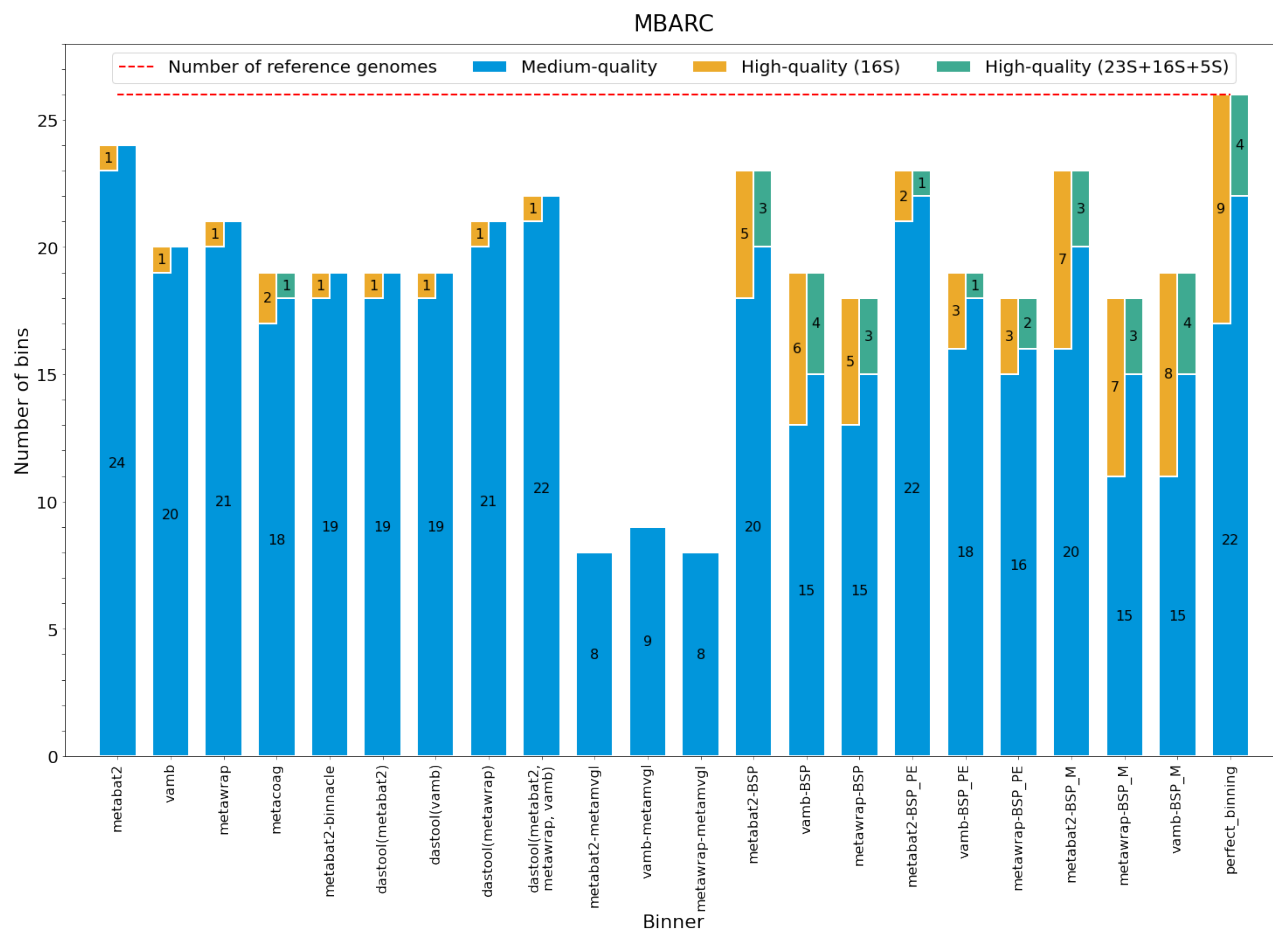

Supplementary Figure 14: MIMAG for **MBARC26** dataset. BSP denotes refining with BINSREADER in default mode, BSP\_M denotes BINSREADER with multiple binning and BSP\_PE denotes BINSREADER with the usage of supplementary paired-end connectivity information, related to Figure 1. perfect\_binning – MAGs constructed from assembly having 100% purity and completeness. High-quality MAGs are divided into MAGs containing at least 16S/18S (orange bars) and MAGs with complete set of rRNA (green bars). Dashed line indicates number of reference genomes in dataset.

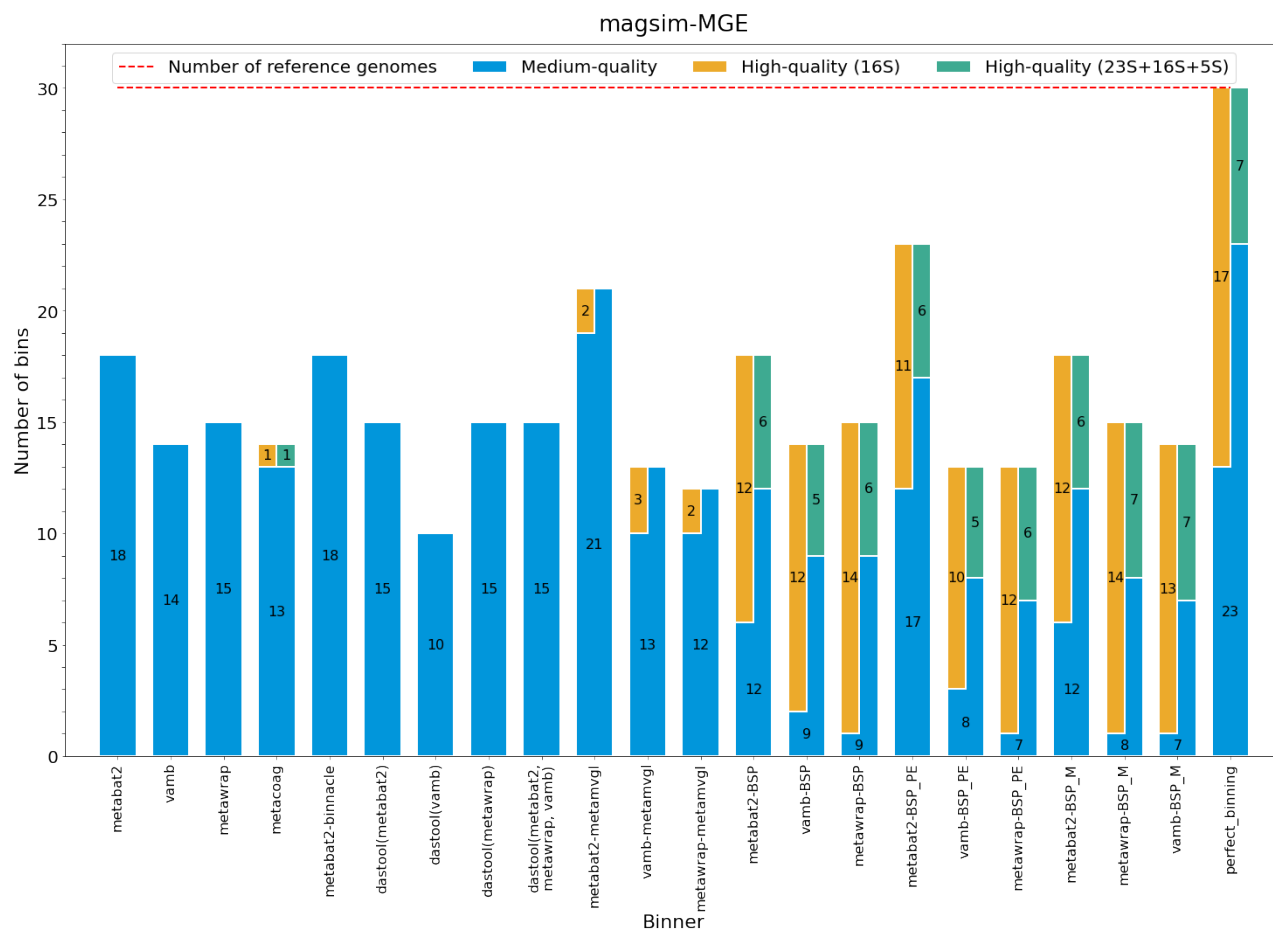

Supplementary Figure 15: MIMAG for **magsim-MGE** dataset. BSP denotes refining with BINSREADER in default mode, BSP\_M denotes BINSREADER with multiple binning and BSP\_PE denotes BINSREADER with the usage of supplementary paired-end connectivity information, related to Figure 1. perfect\_binning – MAGs constructed from assembly having 100% purity and completeness. High-quality MAGs are divided into MAGs containing at least 16S/18S (orange bars) and MAGs with complete set of rRNA (green bars). Dashed line indicates number of reference genomes in dataset.

### 3 Supplementary Tables

| Tool                                     | AC,<br>bp, % | AP,<br>bp, % | F1,<br>bp, % | % binned,<br>by length | % binned,<br>by # seq | # recovered genomes<br>depending on completeness |           |           |
|------------------------------------------|--------------|--------------|--------------|------------------------|-----------------------|--------------------------------------------------|-----------|-----------|
|                                          |              |              |              |                        |                       | >50%                                             | >70%      | >90%      |
| Gold standard                            | 100.0        | 100.0        | 100.0        | 100.0                  | 100.0                 | 30                                               | 30        | 30        |
| DAS Tool + MetaBAT2 +<br>MetaWRAP + VAMB | 47.3         | <b>99.8</b>  | 64.2         | 59.0                   | 8.6                   | 15                                               | <b>15</b> | 12        |
| MetaBAT2                                 | 69.2         | 97.2         | 80.8         | 78.5                   | 30.7                  | 18                                               | <b>15</b> | 12        |
| MetaBAT2 + BinSPreader                   | 72.0         | 97.0         | 82.6         | 81.0                   | 35.0                  | 17                                               | 14        | 12        |
| MetaBAT2 + BinSPreader-PE                | <b>75.8</b>  | 96.6         | <b>85.0</b>  | <b>84.1</b>            | <b>44.3</b>           | <b>23</b>                                        | 14        | 12        |
| MetaBAT2 + Binnacle                      | 66.0         | 97.7         | 78.8         | 78.7                   | 32.5                  | 18                                               | 12        | 9         |
| MetaBAT2 + DAS Tool                      | 47.1         | <b>99.8</b>  | 64.0         | 58.4                   | 7.9                   | 15                                               | <b>15</b> | 12        |
| MetaBAT2 + METAMVGL                      | 71.7         | 95.9         | 82.0         | 77.4                   | 43.9                  | 21                                               | 13        | 9         |
| MetaCoAG                                 | 47.3         | 97.5         | 63.7         | 57.5                   | 8.6                   | 12                                               | 12        | 10        |
| MetaWRAP                                 | 47.4         | <b>99.9</b>  | 64.3         | 59.0                   | 8.6                   | 15                                               | <b>15</b> | 13        |
| MetaWRAP + BinSPreader                   | 50.9         | 99.1         | 67.3         | 62.4                   | 12.2                  | 14                                               | 14        | <b>14</b> |
| MetaWRAP + BinSPreader-PE                | 53.0         | 97.7         | 68.7         | 63.6                   | 15.2                  | 13                                               | 13        | 13        |
| MetaWRAP + DAS Tool                      | 47.4         | <b>99.9</b>  | 64.3         | 59.0                   | 8.6                   | 15                                               | <b>15</b> | 13        |
| MetaWRAP + METAMVGL                      | 49.6         | 97.1         | 65.7         | 59.5                   | 15.4                  | 11                                               | 11        | 10        |
| VAMB                                     | 43.5         | <b>99.8</b>  | 60.6         | 52.8                   | 4.6                   | 14                                               | 13        | 8         |
| VAMB + BinSPreader                       | 49.6         | 98.9         | 66.1         | 59.8                   | 10.1                  | 14                                               | 13        | 13        |
| VAMB + BinSPreader-PE                    | 52.2         | 97.4         | 67.9         | 62.1                   | 13.9                  | 13                                               | 13        | 12        |
| VAMB + DAS Tool                          | 30.9         | <b>99.9</b>  | 47.1         | 32.5                   | 2.1                   | 10                                               | 10        | 6         |
| VAMB + METAMVGL                          | 49.6         | 97.5         | 65.7         | 59.3                   | 14.8                  | 13                                               | 12        | 11        |

Supplementary Table 1: AMBER results for **magsim-MGE** dataset. AC denotes average completeness, AP denotes average purity. The best results for each metrics are highlighted in bold. Related to section Results.

| Tool                   | AC,<br>bp, % | AP,<br>bp, % | F1,<br>bp, % | % binned,<br>bp | % binned,<br>seq | # recovered genomes<br>depending on completeness |           |           |
|------------------------|--------------|--------------|--------------|-----------------|------------------|--------------------------------------------------|-----------|-----------|
|                        |              |              |              |                 |                  | >50%                                             | >70%      | >90%      |
| Gold standard          | 100.0        | 100.0        | 100.0        | 100.0           | 100.0            | 100                                              | 100       | 100       |
| MaxBin2                | 79.3         | 90.4         | 84.5         | 84.9            | 85.3             | 48                                               | 48        | 43        |
| MaxBin2 + BinSPreader  | 87.0         | 84.9         | 85.9         | <b>100.0</b>    | <b>99.9</b>      | 41                                               | 41        | 39        |
| MetaBAT2               | 13.0         | <b>98.3</b>  | 23.0         | 14.8            | 0.8              | 8                                                | 4         | 4         |
| MetaBat2 + BinSPreader | 88.4         | 67.1         | 76.3         | 94.3            | 89.1             | 8                                                | 7         | 6         |
| MetaCoAG               | 82.7         | 91.1         | 86.7         | 92.0            | 90.0             | 53                                               | 52        | 43        |
| VAMB                   | 91.4         | 92.0         | 91.7         | 95.2            | 63.8             | <b>66</b>                                        | <b>65</b> | 56        |
| VAMB + BinSPreader     | <b>97.1</b>  | 91.3         | <b>94.1</b>  | <b>99.9</b>     | 98.9             | 63                                               | 63        | <b>61</b> |

Supplementary Table 2: AMBER results for **simHC+** dataset. AC denotes average completeness, AP denotes average purity. The best results for each metrics are highlighted in bold. Related to section Results.

| Tool                                     | AC,<br>bp, % | AP,<br>bp, % | F1,<br>bp, % | % binned,<br>bp | % binned,<br>seq | # recovered genomes<br>depending on completeness |           |           |
|------------------------------------------|--------------|--------------|--------------|-----------------|------------------|--------------------------------------------------|-----------|-----------|
|                                          |              |              |              |                 |                  | >50%                                             | >70%      | >90%      |
| Gold standard                            | 100.0        | 100.0        | 100.0        | 100.0           | 100.0            | 10                                               | 10        | 10        |
| DAS Tool + MetaBAT2 +<br>MetaWRAP + VAMB | 77.9         | <b>100.0</b> | 87.6         | 50.6            | 26.5             | 8                                                | 8         | 7         |
| MetaBAT2                                 | 66.2         | <b>100.0</b> | 79.7         | 91.7            | 44.4             | 7                                                | 4         | 3         |
| MetaBAT2 + BinSPreader                   | 78.3         | 99.4         | 87.6         | <b>99.8</b>     | 99.3             | 9                                                | 6         | 5         |
| MetaBAT2 + BinSPreader-PE                | 79.8         | <b>100.0</b> | 88.8         | <b>100.0</b>    | <b>100.0</b>     | 9                                                | 6         | 5         |
| MetaBAT2 + Binnacle                      | 60.6         | <b>100.0</b> | 75.4         | 70.7            | 52.7             | 6                                                | 4         | 3         |
| MetaBAT2 + DAS Tool                      | 35.8         | <b>100.0</b> | 52.7         | 30.4            | 16.5             | 3                                                | 3         | 2         |
| MetaBAT2 + METAMVGL                      | 77.9         | 88.4         | 82.8         | 81.2            | 89.2             | 4                                                | 4         | 2         |
| MetaCoAG                                 | 74.6         | 98.6         | 85.0         | 50.6            | 31.4             | 9                                                | 6         | 5         |
| MetaWRAP                                 | 78.8         | <b>100.0</b> | 88.1         | 42.7            | 15.9             | 8                                                | 8         | 8         |
| MetaWRAP + BinSPreader                   | 99.7         | 95.4         | 97.5         | <b>99.8</b>     | 99.4             | 7                                                | 7         | 7         |
| MetaWRAP + BinSPreader-PE                | <b>99.9</b>  | 95.1         | 97.5         | <b>100.0</b>    | <b>100.0</b>     | 7                                                | 7         | 7         |
| MetaWRAP + DAS Tool                      | 59.5         | <b>100.0</b> | 74.6         | 29.7            | 9.0              | 6                                                | 6         | 6         |
| MetaWRAP + METAMVGL                      | 66.5         | 94.3         | 78.0         | 80.9            | 93.3             | 5                                                | 3         | 1         |
| VAMB                                     | 96.5         | <b>100.0</b> | 98.2         | 95.6            | 51.2             | <b>10</b>                                        | <b>10</b> | <b>10</b> |
| VAMB + BinSPreader                       | 99.6         | <b>99.8</b>  | <b>99.7</b>  | <b>99.8</b>     | 99.4             | <b>10</b>                                        | <b>10</b> | <b>10</b> |
| VAMB + BinSPreader-PE                    | <b>100.0</b> | <b>100.0</b> | <b>100.0</b> | <b>100.0</b>    | <b>100.0</b>     | <b>10</b>                                        | <b>10</b> | <b>10</b> |
| VAMB + DAS Tool                          | 49.1         | <b>100.0</b> | 65.9         | 23.9            | 7.7              | 5                                                | 5         | 5         |
| VAMB + METAMVGL                          | 78.0         | 94.8         | 85.6         | 86.3            | 94.5             | 7                                                | 5         | 3         |

Supplementary Table 3: AMBER results for mock **Zymo** dataset. AC denotes average completeness, AP denotes average purity. The best results for each metrics are highlighted in bold. Related to section Results.

| Tool                                     | AC,<br>bp, % | AP,<br>bp, % | F1,<br>bp, % | % binned,<br>bp | % binned,<br>seq | # recovered genomes<br>depending on completeness |           |           |
|------------------------------------------|--------------|--------------|--------------|-----------------|------------------|--------------------------------------------------|-----------|-----------|
|                                          |              |              |              |                 |                  | >50%                                             | >70%      | >90%      |
| Gold standard                            | 100.0        | 100.0        | 100.0        | 100.0           | 100.0            | 25                                               | 25        | 25        |
| DAS Tool + MetaBAT2 +<br>MetaWRAP + VAMB | 88.7         | 99.2         | 93.6         | 89.2            | 50.4             | 22                                               | <b>22</b> | <b>20</b> |
| MetaBAT2                                 | 88.9         | 98.0         | 93.2         | 96.1            | 62.2             | <b>23</b>                                        | 20        | 15        |
| MetaBAT2 + BinSPreader                   | 92.1         | 97.3         | 94.7         | <b>99.9</b>     | 99.3             | 22                                               | 19        | 17        |
| MetaBAT2 + BinSPreader-PE                | 91.0         | 96.2         | 93.5         | <b>100.0</b>    | <b>99.7</b>      | 20                                               | 17        | 14        |
| MetaBAT2 + Binnacle                      | 82.0         | 97.6         | 89.1         | 96.4            | 71.1             | 18                                               | 15        | 10        |
| MetaBAT2 + DAS Tool                      | 74.5         | 99.6         | 85.2         | 73.1            | 39.0             | 18                                               | 18        | 14        |
| MetaBAT2 + METAMVGL                      | 67.3         | 86.5         | 75.7         | 66.5            | 84.9             | 8                                                | 8         | 6         |
| MetaCoAG                                 | 92.6         | 93.9         | 93.2         | 96.5            | 89.4             | 17                                               | 16        | 15        |
| MetaWRAP                                 | 80.9         | <b>99.8</b>  | 89.4         | 79.7            | 47.8             | 21                                               | 21        | 19        |
| MetaWRAP + BinSPreader                   | <b>98.9</b>  | 92.3         | <b>95.5</b>  | <b>99.9</b>     | 99.3             | 18                                               | 18        | 17        |
| MetaWRAP + BinSPreader-PE                | 96.3         | 92.3         | 94.2         | <b>100.0</b>    | <b>99.7</b>      | 18                                               | 18        | 17        |
| MetaWRAP + DAS Tool                      | 80.9         | <b>99.8</b>  | 89.4         | 79.7            | 47.8             | 21                                               | 21        | 19        |
| MetaWRAP + METAMVGL                      | 69.5         | 90.1         | 78.5         | 69.8            | 87.4             | 8                                                | 8         | 5         |
| VAMB                                     | 91.2         | 95.1         | 93.1         | 92.6            | 48.1             | 20                                               | 20        | 16        |
| VAMB + BinSPreader                       | 96.1         | 92.9         | 94.5         | <b>99.9</b>     | 99.3             | 19                                               | 19        | 18        |
| VAMB + BinSPreader-PE                    | 95.3         | 92.7         | 94.0         | <b>100.0</b>    | <b>99.7</b>      | 19                                               | 19        | 17        |
| VAMB + DAS Tool                          | 72.8         | <b>99.9</b>  | 84.2         | 71.9            | 36.1             | 19                                               | 19        | 16        |
| VAMB + METAMVGL                          | 65.8         | 89.4         | 75.8         | 67.5            | 80.4             | 9                                                | 8         | 6         |

Supplementary Table 4: AMBER results for **MBARC26** dataset. AC denotes average completeness, AP denotes average purity. The best results for each metrics are highlighted in bold. Related to section Results.

| Tool                                     | AC,<br>bp, % | AP,<br>bp, % | F1,<br>bp, % | % binned,<br>bp | % binned,<br>seq | # recovered genomes<br>depending on completeness |          |          |
|------------------------------------------|--------------|--------------|--------------|-----------------|------------------|--------------------------------------------------|----------|----------|
|                                          |              |              |              |                 |                  | >50%                                             | >70%     | >90%     |
| Gold standard                            | 100.0        | 100.0        | 100.0        | 100.0           | 100.0            | 11                                               | 11       | 11       |
| DAS Tool + MetaBAT2 +<br>MetaWRAP + VAMB | 77.9         | <b>98.4</b>  | 86.9         | 86.5            | 37.6             | <b>9</b>                                         | <b>9</b> | 5        |
| MetaBAT2                                 | 66.9         | 97.7         | 79.4         | 91.8            | 34.5             | 7                                                | 7        | 2        |
| MetaBAT2 + BinSPreader                   | 84.2         | 95.5         | 89.5         | <b>99.8</b>     | 97.1             | 6                                                | 6        | 2        |
| MetaBAT2 + BinSPreader-PE                | 83.6         | 95.2         | 89.0         | <b>100.0</b>    | <b>98.8</b>      | 6                                                | 6        | 2        |
| MetaBAT2 + Binnacle                      | 49.5         | 94.8         | 65.1         | 87.5            | 53.4             | 3                                                | 2        | 1        |
| MetaBAT2 + DAS Tool                      | 57.4         | 96.3         | 71.9         | 71.8            | 21.8             | 6                                                | 6        | 2        |
| MetaBAT2 + METAMVGL                      | 74.7         | 85.1         | 79.5         | 71.0            | 87.5             | 3                                                | 2        | 1        |
| MetaCoAG                                 | 75.1         | 88.6         | 81.3         | 94.8            | 65.8             | 5                                                | 5        | 4        |
| MetaWRAP                                 | 79.3         | 96.5         | 87.1         | 92.0            | 40.7             | 8                                                | 8        | 6        |
| MetaWRAP + BinSPreader                   | <b>96.4</b>  | 92.7         | <b>94.6</b>  | <b>99.8</b>     | 97.1             | 8                                                | 8        | <b>7</b> |
| MetaWRAP + BinSPreader-PE                | 95.2         | 91.1         | 93.1         | <b>100.0</b>    | <b>98.8</b>      | 8                                                | 8        | 6        |
| MetaWRAP + DAS Tool                      | 79.3         | 96.5         | 87.1         | 92.0            | 40.7             | 8                                                | 8        | 6        |
| MetaWRAP + METAMVGL                      | 75.6         | 87.9         | 81.3         | 71.1            | 89.8             | 4                                                | 4        | 2        |
| VAMB                                     | 77.9         | 98.1         | 86.8         | 91.0            | 31.7             | 8                                                | 8        | 3        |
| VAMB + BinSPreader                       | 95.2         | 93.4         | 94.3         | <b>99.8</b>     | 97.1             | 6                                                | 6        | 5        |
| VAMB + BinSPreader-PE                    | 95.2         | 93.6         | 94.4         | <b>100.0</b>    | <b>98.8</b>      | 6                                                | 6        | 4        |
| VAMB + DAS Tool                          | 69.9         | 97.6         | 81.5         | 79.4            | 25.3             | 7                                                | 7        | 3        |
| VAMB + METAMVGL                          | 70.1         | 88.9         | 78.4         | 65.6            | 88.9             | 4                                                | 3        | 2        |

Supplementary Table 5: AMBER results for **BMock12** dataset. AC denotes average completeness, AP denotes average purity. The best results for each metrics are highlighted in bold. Related to section Results.

| Tool                   | AC,<br>bp, % | AP,<br>bp, % | F1,<br>bp, % | % binned,<br>bp | % binned,<br>seq | # recovered genomes<br>depending on completeness |          |          |
|------------------------|--------------|--------------|--------------|-----------------|------------------|--------------------------------------------------|----------|----------|
|                        |              |              |              |                 |                  | >50%                                             | >70%     | >90%     |
| Gold standard          | 100.0        | 100.0        | 100.0        | 100.0           | 100.0            | 10                                               | 10       | 10       |
| bin3C                  | 96.1         | <b>96.7</b>  | 96.4         | 88.3            | 59.5             | 7                                                | 7        | 6        |
| bin3C + BinSPreader    | 99.6         | 96.5         | 98.0         | <b>100.0</b>    | 99.7             | <b>7</b>                                         | <b>7</b> | <b>7</b> |
| bin3C + BinSPreader-PE | <b>99.7</b>  | 96.6         | <b>98.2</b>  | <b>100.0</b>    | <b>100.0</b>     | <b>7</b>                                         | <b>7</b> | <b>7</b> |

Supplementary Table 6: AMBER results for **Zymo** dataset for bin3C binning. AC denotes average completeness, AP denotes average purity. The best results for each metrics are highlighted in bold. Related to section Results.

| Tool                       | # bins | AC %        | AP %        | F1 %        | # recovered genomes (90% completeness) |
|----------------------------|--------|-------------|-------------|-------------|----------------------------------------|
| MetaBAT2                   | 50     | 58.5        | 99.0        | 64.7        | 15                                     |
| MetaBAT2 + BinSPreader     | 50     | 59.8        | 97.3        | 64.9        | 16                                     |
| MetaBAT2 + BinSPreader-HiC | 50     | 69.1        | 92.7        | 69.6        | 15                                     |
| MetaBAT2 + BinSPreader-PE  | 50     | 60.1        | 97.3        | 65.4        | 16                                     |
| MetaBAT2 + Binnacle        | 57     | 51.0        | 99.2        | 57.2        | 15                                     |
| MetaBAT2 + DAS Tool        | 23     | 87.7        | 99.4        | 92.3        | 13                                     |
| MetaBAT2 + METAMVGL        | 46     | 46.2        | 97.1        | 53.8        | 4                                      |
| MetaCoAG                   | 37     | 82.5        | 95.4        | 86.2        | 22                                     |
| MetaWRAP                   | 31     | 94.2        | 99.4        | 96.5        | <b>26</b>                              |
| MetaWRAP + BinSPreader     | 31     | 94.7        | 95.7        | 94.9        | 23                                     |
| MetaWRAP + BinSPreader-HiC | 31     | 97.3        | 88.5        | 91.1        | 19                                     |
| MetaWRAP + BinSPreader-PE  | 31     | 94.8        | 95.0        | 94.7        | 21                                     |
| MetaWRAP + DAS Tool        | 28     | 94.7        | 99.4        | 96.8        | 24                                     |
| MetaWRAP + METAMVGL        | 31     | 72.1        | 95.7        | 80.2        | 7                                      |
| VAMB                       | 25     | 86.3        | 99.5        | 90.7        | 17                                     |
| VAMB + BinSPreader         | 25     | 91.3        | 93.4        | 90.5        | 13                                     |
| VAMB + BinSPreader-HiC     | 25     | <b>98.9</b> | 78.2        | 84.1        | 14                                     |
| VAMB + BinSPreader-PE      | 25     | 91.4        | 91.4        | 89.4        | 12                                     |
| VAMB + DAS Tool            | 19     | 94.3        | 99.5        | 96.5        | 17                                     |
| VAMB + METAMVGL            | 25     | 69.2        | 93.0        | 75.6        | 2                                      |
| bin3C                      | 168    | 17.9        | <b>99.8</b> | 18.6        | <b>26</b>                              |
| bin3C + BinSPreader        | 168    | 18.3        | 99.4        | 18.8        | <b>26</b>                              |
| bin3C + BinSPreader-HiC    | 168    | 21.9        | 98.1        | 22.0        | 24                                     |
| bin3C + BinSPreader-PE     | 168    | 18.4        | 99.4        | 18.8        | <b>26</b>                              |
| bin3C + DAS Tool           | 29     | 96.4        | 99.2        | <b>97.7</b> | <b>26</b>                              |
| bin3C + METAMVGL           | 157    | 15.1        | 99.2        | 17.0        | 6                                      |

Supplementary Table 7: CheckM results for **IC9** dataset. Related to section Results.

| Tool                      | # bins | AC %        | AP %        | F1 %        | # recovered genomes (90% completeness) |
|---------------------------|--------|-------------|-------------|-------------|----------------------------------------|
| MetaBAT2                  | 12     | 72.2        | 97.7        | 76.6        | 6                                      |
| MetaBAT2 + BinSPreader    | 12     | 73.1        | 95.6        | 76.3        | 5                                      |
| MetaBAT2 + BinSPreader-PE | 12     | 73.1        | 95.7        | 76.4        | 5                                      |
| MetaBAT2 + Binnacle       | 11     | 77.4        | 96.9        | 81.3        | 6                                      |
| MetaBAT2 + DAS Tool       | 6      | 90.5        | 96.9        | 93.4        | 4                                      |
| MetaCoAG                  | 9      | 88.9        | 94.7        | 91.3        | 3                                      |
| MetaWRAP                  | 8      | 97.5        | <b>99.2</b> | <b>98.3</b> | <b>8</b>                               |
| MetaWRAP + BinSPreader    | 8      | <b>98.2</b> | 98.3        | <b>98.3</b> | <b>8</b>                               |
| MetaWRAP + BinSPreader-PE | 8      | <b>98.3</b> | 98.3        | <b>98.3</b> | <b>8</b>                               |
| MetaWRAP + DAS Tool       | 7      | 97.8        | <b>99.1</b> | <b>98.4</b> | 7                                      |
| VAMB                      | 7      | 85.7        | 90.1        | 83.9        | 4                                      |
| VAMB + BinSPreader        | 7      | 90.2        | 85.5        | 85.7        | 3                                      |
| VAMB + BinSPreader-PE     | 7      | 90.2        | 85.3        | 85.6        | 3                                      |
| VAMB + DAS Tool           | 5      | 95.6        | 98.7        | 97.0        | 4                                      |

Supplementary Table 8: CheckM results for **Sharon** dataset. Related to section Results.

| Dataset/Binner                             | MBARC     | BMock     | Zymo      | magsim-MGE |
|--------------------------------------------|-----------|-----------|-----------|------------|
| <b>MetaBAT2</b>                            | 32        | 11        | 11        | 11         |
| <b>VAMB</b>                                | 31        | 13        | <b>12</b> | 8          |
| <b>metaWRAP</b>                            | 33        | 11        | <b>12</b> | 12         |
| <b>MetaCoAG</b>                            | 42        | 12        | <b>12</b> | 12         |
| <b>MetaBAT2-Binnacle</b>                   | 31        | 12        | <b>12</b> | 13         |
| <b>DAS TOOL (MetaBAT2)</b>                 | 26        | 5         | 5         | 11         |
| <b>DAS TOOL (VAMB)</b>                     | 28        | 8         | 8         | 8          |
| <b>DAS TOOL (metaWRAP)</b>                 | 33        | 11        | 8         | 12         |
| <b>DAS TOOL (MetaBAT2, metaWRAP, VAMB)</b> | 30        | 11        | 10        | 12         |
| <b>MetaBAT2-METAMVGL</b>                   | 35        | 12        | 10        | <b>17</b>  |
| <b>VAMB-METAMVGL</b>                       | 36        | 14        | 8         | 14         |
| <b>metaWRAP-METAMVGL</b>                   | 36        | 14        | 6         | 16         |
| <b>MetaBAT2-BinSPreader</b>                | <b>44</b> | <b>17</b> | <b>12</b> | 13         |
| <b>VAMB-BinSPreader</b>                    | <b>44</b> | <b>17</b> | <b>12</b> | 11         |
| <b>metaWRAP-BinSPreader</b>                | <b>44</b> | <b>17</b> | <b>12</b> | 14         |
| <b>MetaBAT2-BinSPreader-PE</b>             | <b>44</b> | <b>17</b> | <b>12</b> | <b>17</b>  |
| <b>VAMB-BinSPreader-PE</b>                 | <b>44</b> | <b>17</b> | <b>12</b> | 13         |
| <b>metaWRAP-BinSPreader-PE</b>             | <b>44</b> | <b>17</b> | <b>12</b> | 16         |
| <b>MetaBAT2-BinSPreader-Multiple</b>       | <b>44</b> | <b>17</b> | <b>12</b> | 13         |
| <b>VAMB-BinSPreader-Multiple</b>           | <b>44</b> | <b>17</b> | <b>12</b> | 11         |
| <b>metaWRAP-BinSPreader-Multiple</b>       | <b>44</b> | <b>17</b> | <b>12</b> | 14         |
| <b>Assembly</b>                            | 44        | 17        | 12        | 23         |
| <b>Reference genomes</b>                   | 54        | 19        | 12        | 32         |

Supplementary Table 9: Numbers of recovered CRISPRs for mock metagenomes and **magsim-MGE** dataset. BinSPreader-PE denotes refining mode of BINSREADER utilizing additional paired-end links, and BinSPreader-Multiple denotes refining mode with multiple binning of contigs (but without paired-end data). Best results are highlighted in bold. Related to section Results.

| Dataset/Binner                      | MBARC      | BMock    | Zymo       | magsim-MGE |
|-------------------------------------|------------|----------|------------|------------|
| MetaBAT2                            | 130        | <b>8</b> | 122        | 115        |
| VAMB                                | 104        | <b>8</b> | 129        | 76         |
| metaWRAP                            | 54         | <b>8</b> | 130        | 102        |
| MetaCoAG                            | <b>138</b> | 6        | 133        | 106        |
| MetaBAT2-Binnacle                   | 135        | 7        | 129        | 117        |
| DAS TOOL (MetaBAT2)                 | 17         | 5        | 29         | 101        |
| DAS TOOL (VAMB)                     | 22         | 7        | 36         | 20         |
| DAS TOOL (metaWRAP)                 | 54         | <b>8</b> | 45         | 102        |
| DAS TOOL (MetaBAT2, metaWRAP, VAMB) | 55         | <b>8</b> | 81         | 102        |
| MetaBAT2-METAMVGL                   | 103        | 5        | 95         | 108        |
| VAMB-METAMVGL                       | 66         | 5        | 111        | 97         |
| metaWRAP-METAMVGL                   | 121        | 5        | 63         | 92         |
| MetaBAT2-BinSPreader                | <b>139</b> | <b>8</b> | 133        | 135        |
| VAMB-BinSPreader                    | <b>139</b> | <b>8</b> | 133        | 112        |
| metaWRAP-BinSPreader                | <b>139</b> | <b>8</b> | 133        | 121        |
| MetaBAT2-BinSPreader-PE             | <b>139</b> | <b>8</b> | <b>138</b> | <b>138</b> |
| VAMB-BinSPreader-PE                 | <b>139</b> | <b>8</b> | <b>138</b> | 124        |
| metaWRAP-BinSPreader-PE             | <b>139</b> | <b>8</b> | <b>138</b> | 124        |
| MetaBAT2-BinSPreader-Multiple       | <b>139</b> | <b>8</b> | 133        | 135        |
| VAMB-BinSPreader-Multiple           | <b>139</b> | <b>8</b> | 133        | 112        |
| metaWRAP-BinSPreader-Multiple       | <b>139</b> | <b>8</b> | 133        | 121        |
| Assembly                            | 139        | 8        | 138        | 145        |
| Reference genomes                   | 153        | 11       | 182        | 220        |

Supplementary Table 10: Numbers of recovered AMR genes for mock metagenomes and **magsim-MGE** dataset. BinSPreader-PE denotes refining mode of BINSPPREADER utilizing paired-end links, and BinSPreader-Multiple denotes refining mode with multiple binning of contigs (but without paired-end data). Best results are highlighted in bold.



| <b>Binner</b>                   | <b>Genes recovered</b> |
|---------------------------------|------------------------|
| <b>MetaBAT2</b>                 | 70                     |
| <b>VAMB</b>                     | 54                     |
| <b>metaWRAP</b>                 | 70                     |
| <b>MetaCoAG</b>                 | 134                    |
| <b>Bin3C</b>                    | 127                    |
| <b>MetaBAT2-Binnacle</b>        | 73                     |
| <b>DAS TOOL (MetaBAT2)</b>      | 51                     |
| <b>DAS TOOL (VAMB)</b>          | 49                     |
| <b>DAS TOOL (metaWRAP)</b>      | 65                     |
| <b>DAS TOOL (Bin3C)</b>         | 115                    |
| <b>MetaBAT2-METAMVGL</b>        | 139                    |
| <b>VAMB-METAMVGL</b>            | 131                    |
| <b>metaWRAP-METAMVGL</b>        | 136                    |
| <b>Bin3C-METAMVGL</b>           | 146                    |
| <b>MetaBAT2-BinSPreader</b>     | 160                    |
| <b>VAMB-BinSPreader</b>         | 145                    |
| <b>metaWRAP-BinSPreader</b>     | 156                    |
| <b>Bin3C-BinSPreader</b>        | 165                    |
| <b>MetaBAT2-BinSPreader-PE</b>  | 161                    |
| <b>VAMB-BinSPreader-PE</b>      | 146                    |
| <b>metaWRAP-BinSPreader-PE</b>  | 157                    |
| <b>Bin3C-BinSPreader-PE</b>     | 166                    |
| <b>MetaBAT2-BinSPreader-HiC</b> | <b>191</b>             |
| <b>metaWRAP-BinSPreader-HiC</b> | <b>191</b>             |
| <b>VAMB-BinSPreader-HiC</b>     | <b>191</b>             |
| <b>Bin3C-BinSPreader-HiC</b>    | <b>191</b>             |
| <b>Assembly</b>                 | 300                    |

Supplementary Table 11: Numbers of recovered AMR (AntiMicrobial Resistance) genes for **IC9** dataset. BinSPreader-PE denotes refining mode of BINSPPREADER utilizing paired-end links, and BinSPreader-HiC denotes refining mode utilizing Hi-C links. Related to section Results.

| <b>Zymo</b> |                                            |                   |                   |
|-------------|--------------------------------------------|-------------------|-------------------|
|             | <b>Binner</b>                              | <b>GF &gt;50%</b> | <b>GF &gt;90%</b> |
|             | <b>MetaBAT2</b>                            | 0                 | 0                 |
|             | <b>VAMB</b>                                | 0                 | 0                 |
|             | <b>metaWRAP</b>                            | 0                 | 0                 |
|             | <b>MetaCoAG</b>                            | 2                 | 1                 |
|             | <b>MetaBAT2-Binnacle</b>                   | 0                 | 0                 |
|             | <b>DAS TOOL (MetaBAT2)</b>                 | 0                 | 0                 |
|             | <b>DAS TOOL (VAMB)</b>                     | 0                 | 0                 |
|             | <b>DAS TOOL (metaWRAP)</b>                 | 0                 | 0                 |
|             | <b>DAS TOOL (MetaBAT2, metaWRAP, VAMB)</b> | 0                 | 0                 |
|             | <b>MetaBAT2-METAMVGL</b>                   | 1                 | 1                 |
|             | <b>VAMB-METAMVGL</b>                       | 1                 | 1                 |
|             | <b>metaWRAP-METAMVGL</b>                   | 2                 | 1                 |
|             | <b>MetaBAT2-BinSPreader</b>                | 4                 | 1                 |
|             | <b>VAMB-BinSPreader</b>                    | 4                 | 1                 |
|             | <b>metaWRAP-BinSPreader</b>                | 4                 | 1                 |
|             | <b>MetaBAT2-BinSPreader-PE</b>             | 5                 | 2                 |
|             | <b>VAMB-BinSPreader-PE</b>                 | 5                 | 2                 |
|             | <b>metaWRAP-BinSPreader-PE</b>             | 5                 | 2                 |
|             | <b>MetaBAT2-BinSPreader-Multiple</b>       | 4                 | 1                 |
|             | <b>metaWRAP-BinSPreader-Multiple</b>       | 4                 | 1                 |
|             | <b>VAMB-BinSPreader-Multiple</b>           | 4                 | 1                 |
|             | <b>Assembly</b>                            | 5                 | 2                 |

Supplementary Table 12: Number of 16S/18S rRNA genes depending on their genome fraction (GF) threshold on **Zymo** dataset. The value of GF indicates the length of the assembled gene in relation to full gene. BinSPreader-PE denotes refining mode of BINSREADER utilizing paired-end links, and BinSPreader-Multiple denotes refining mode with multiple binning of contigs. Related to section Results.

| <b>magsim-MGE</b> |                                            |                   |                   |
|-------------------|--------------------------------------------|-------------------|-------------------|
|                   | <b>Binner</b>                              | <b>GF &gt;50%</b> | <b>GF &gt;90%</b> |
|                   | <b>MetaBAT2</b>                            | 1                 | 1                 |
|                   | <b>VAMB</b>                                | 1                 | 1                 |
|                   | <b>metaWRAP</b>                            | 2                 | 2                 |
|                   | <b>MetaCoAG</b>                            | 7                 | 6                 |
|                   | <b>MetaBAT2-Binnacle</b>                   | 2                 | 2                 |
|                   | <b>DAS TOOL (MetaBAT2)</b>                 | 1                 | 1                 |
|                   | <b>DAS TOOL (VAMB)</b>                     | 1                 | 1                 |
|                   | <b>DAS TOOL (metaWRAP)</b>                 | 2                 | 2                 |
|                   | <b>DAS TOOL (MetaBAT2, metaWRAP, VAMB)</b> | 2                 | 2                 |
|                   | <b>MetaBAT2-METAMVGL</b>                   | 8                 | 5                 |
|                   | <b>VAMB-METAMVGL</b>                       | 8                 | 4                 |
|                   | <b>metaWRAP-METAMVGL</b>                   | 8                 | 4                 |
|                   | <b>MetaBAT2-BinSPreader</b>                | <b>20</b>         | <b>17</b>         |
|                   | <b>VAMB-BinSPreader</b>                    | 18                | 16                |
|                   | <b>metaWRAP-BinSPreader</b>                | 18                | 16                |
|                   | <b>MetaBAT2-BinSPreader-PE</b>             | <b>20</b>         | <b>17</b>         |
|                   | <b>VAMB-BinSPreader-PE</b>                 | 19                | <b>17</b>         |
|                   | <b>metaWRAP-BinSPreader-PE</b>             | 19                | <b>17</b>         |
|                   | <b>MetaBAT2-BinSPreader-Multiple</b>       | <b>20</b>         | <b>17</b>         |
|                   | <b>metaWRAP-BinSPreader-Multiple</b>       | 18                | 16                |
|                   | <b>VAMB-BinSPreader-Multiple</b>           | 18                | 16                |
|                   | <b>Assembly</b>                            | 23                | 18                |

Supplementary Table 13: Number of 16S/18S rRNA genes depending on their genome fraction (GF) threshold on **magsim-MGE** dataset. The value of GF indicates the length of the assembled gene in relation to full gene. BinSPreader-PE denotes refining mode of BINSREADER utilizing paired-end links, and BinSPreader-Multiple denotes refining mode with multiple binning of contigs. Related to section Results.

| <b>BMock12</b>                      |                   |                   |
|-------------------------------------|-------------------|-------------------|
| <b>Binner</b>                       | <b>GF &gt;50%</b> | <b>GF &gt;90%</b> |
| MetaBAT2                            | 0                 | 0                 |
| VAMB                                | 0                 | 0                 |
| metaWRAP                            | 0                 | 0                 |
| MetaCoAG                            | 3                 | 1                 |
| MetaBAT2-Binnacle                   | 2                 | 0                 |
| DAS TOOL (MetaBAT2)                 | 0                 | 0                 |
| DAS TOOL (VAMB)                     | 0                 | 0                 |
| DAS TOOL (metaWRAP)                 | 0                 | 0                 |
| DAS TOOL (MetaBAT2, metaWRAP, VAMB) | 0                 | 0                 |
| MetaBAT2-METAMVGL                   | 0                 | 0                 |
| VAMB-METAMVGL                       | 0                 | 0                 |
| metaWRAP-METAMVGL                   | 0                 | 0                 |
| MetaBAT2-BinSPreader                | 4                 | 1                 |
| VAMB-BinSPreader                    | 4                 | 1                 |
| metaWRAP-BinSPreader                | 4                 | 1                 |
| MetaBAT2-BinSPreader-PE             | 4                 | 1                 |
| VAMB-BinSPreader-PE                 | 4                 | 1                 |
| metaWRAP-BinSPreader-PE             | 4                 | 1                 |
| MetaBAT2-BinSPreader-Multiple       | 4                 | 1                 |
| metaWRAP-BinSPreader-Multiple       | 4                 | 1                 |
| VAMB-BinSPreader-Multiple           | 4                 | 1                 |
| Assembly                            | 4                 | 1                 |

Supplementary Table 14: Number of 16S/18S rRNA genes depending on their genome fraction (GF) threshold on **BMock12** dataset. The value of GF indicates the length of the assembled gene in relation to full gene. BinSPreader-PE denotes refining mode of BINSREADER utilizing paired-end links, and BinSPreader-Multiple denotes refining mode with multiple binning of contigs. Related to section Results.

| <b>MBARC26</b>                      |                   |                   |
|-------------------------------------|-------------------|-------------------|
| <b>Binner</b>                       | <b>GF &gt;50%</b> | <b>GF &gt;90%</b> |
| MetaBAT2                            | 2                 | 1                 |
| VAMB                                | 3                 | 1                 |
| metaWRAP                            | 3                 | 1                 |
| MetaCoAG                            | 12                | <b>9</b>          |
| MetaBAT2-Binnacle                   | 7                 | 3                 |
| DAS TOOL (MetaBAT2)                 | 2                 | 1                 |
| DAS TOOL (VAMB)                     | 3                 | 1                 |
| DAS TOOL (metaWRAP)                 | 3                 | 1                 |
| DAS TOOL (MetaBAT2, metaWRAP, VAMB) | 3                 | 1                 |
| MetaBAT2-METAMVGL                   | 0                 | 0                 |
| VAMB-METAMVGL                       | 0                 | 0                 |
| metaWRAP-METAMVGL                   | 0                 | 0                 |
| MetaBAT2-BinSPreader                | <b>16</b>         | <b>9</b>          |
| VAMB-BinSPreader                    | <b>16</b>         | <b>9</b>          |
| metaWRAP-BinSPreader                | <b>16</b>         | <b>9</b>          |
| MetaBAT2-BinSPreader-PE             | <b>16</b>         | <b>9</b>          |
| VAMB-BinSPreader-PE                 | <b>16</b>         | <b>9</b>          |
| metaWRAP-BinSPreader-PE             | <b>16</b>         | <b>9</b>          |
| MetaBAT2-BinSPreader-Multiple       | <b>16</b>         | <b>9</b>          |
| metaWRAP-BinSPreader-Multiple       | <b>16</b>         | <b>9</b>          |
| VAMB-BinSPreader-Multiple           | <b>16</b>         | <b>9</b>          |
| Assembly                            | 16                | 9                 |

Supplementary Table 15: Number of 16S/18S rRNA genes depending on their genome fraction (GF) threshold on **MBARC26** dataset. The value of GF indicates the length of the assembled gene in relation to full gene. BinSPreader-PE denotes refining mode of BINSREADER utilizing paired-end links, and BinSPreader-Multiple denotes refining mode with multiple binning of contigs. Related to section Results.

| Tool                       | 16S rRNA |          | 23S rRNA  |          | 5S rRNA   |           | Total rRNA |
|----------------------------|----------|----------|-----------|----------|-----------|-----------|------------|
|                            | >50%     | >80%     | >50%      | >80%     | >50%      | >80%      |            |
| Assembly                   | 7        | 3        | 12        | 6        | 54        | 47        | 73         |
| MetaBAT2                   | 0        | 0        | 0         | 0        | 7         | 6         | 7          |
| MetaBAT2 + BinSPreader     | <b>7</b> | <b>3</b> | <b>12</b> | <b>6</b> | 49        | 40        | 68         |
| MetaBAT2 + BinSPreader-HiC | <b>7</b> | <b>3</b> | <b>12</b> | <b>6</b> | <b>52</b> | <b>44</b> | <b>71</b>  |
| MetaBAT2 + BinSPreader-PE  | <b>7</b> | <b>3</b> | <b>12</b> | <b>6</b> | 49        | 40        | 68         |
| MetaBAT2 + Binnacle        | 0        | 0        | 0         | 0        | 7         | 7         | 7          |
| MetaBAT2 + DAS Tool        | 0        | 0        | 0         | 0        | 5         | 4         | 5          |
| MetaBAT2 + METAMVGL        | 1        | 0        | 3         | 1        | 28        | 23        | 32         |
| MetaCoAG                   | 5        | <b>3</b> | 10        | 5        | 21        | 19        | 36         |
| MetaWRAP                   | 0        | 0        | 0         | 0        | 8         | 8         | 8          |
| MetaWRAP + BinSPreader     | <b>7</b> | <b>3</b> | <b>12</b> | <b>6</b> | 48        | 40        | 67         |
| MetaWRAP + BinSPreader-HiC | <b>7</b> | <b>3</b> | <b>12</b> | <b>6</b> | <b>52</b> | <b>44</b> | <b>71</b>  |
| MetaWRAP + BinSPreader-PE  | <b>7</b> | <b>3</b> | <b>12</b> | <b>6</b> | 48        | 40        | 67         |
| MetaWRAP + DAS Tool        | 0        | 0        | 0         | 0        | 8         | 8         | 8          |
| MetaWRAP + METAMVGL        | 0        | 0        | 3         | 1        | 26        | 21        | 29         |
| VAMB                       | 1        | 1        | 5         | 3        | 6         | 6         | 12         |
| VAMB + BinSPreader         | <b>7</b> | <b>3</b> | 11        | 5        | 47        | 39        | 65         |
| VAMB + BinSPreader-HiC     | <b>7</b> | <b>3</b> | <b>12</b> | <b>6</b> | 51        | <b>44</b> | 70         |
| VAMB + BinSPreader-PE      | <b>7</b> | <b>3</b> | <b>12</b> | <b>6</b> | 47        | 40        | 66         |
| VAMB + DAS Tool            | 1        | 1        | 5         | 3        | 5         | 5         | 11         |
| VAMB + METAMVGL            | 0        | 0        | 3         | 0        | 22        | 18        | 25         |
| bin3C                      | 6        | <b>3</b> | <b>12</b> | <b>6</b> | 18        | 16        | 36         |
| bin3C + BinSPreader        | <b>7</b> | <b>3</b> | <b>12</b> | <b>6</b> | 49        | 40        | 68         |
| bin3C + BinSPreader-HiC    | <b>7</b> | <b>3</b> | <b>12</b> | <b>6</b> | <b>52</b> | <b>44</b> | <b>71</b>  |
| bin3C + BinSPreader-PE     | <b>7</b> | <b>3</b> | <b>12</b> | <b>6</b> | 49        | 40        | 68         |
| bin3C + DAS Tool           | 5        | 2        | 8         | 4        | 15        | 14        | 28         |
| bin3C + METAMVGL           | 0        | 0        | 3         | 1        | 21        | 17        | 24         |

Supplementary Table 16: Number of recovered rRNA genes in bins of the **IC9** dataset depending on their completeness. The best results are highlighted in bold. Related to section Results.

| Tool                      | 16S rRNA |          | 23S rRNA |          | 5S rRNA   |           | Total rRNA |
|---------------------------|----------|----------|----------|----------|-----------|-----------|------------|
|                           | >50%     | >80%     | >50%     | >80%     | >50%      | >80%      |            |
| Assembly                  | 7        | 1        | 6        | 4        | 16        | 14        | 29         |
| MetaBAT2                  | 0        | 0        | 0        | 0        | 1         | 1         | 1          |
| MetaBAT2 + BinSPreader    | 3        | <b>1</b> | 3        | <b>3</b> | <b>12</b> | <b>10</b> | 18         |
| MetaBAT2 + BinSPreader-PE | <b>4</b> | <b>1</b> | <b>4</b> | <b>3</b> | <b>12</b> | <b>10</b> | <b>20</b>  |
| MetaBAT2 + Binnacle       | 1        | 0        | 0        | 0        | 1         | 1         | 2          |
| MetaBAT2 + DAS Tool       | 0        | 0        | 0        | 0        | 1         | 1         | 1          |
| MetaCoAG                  | 3        | 0        | 1        | 1        | 2         | 2         | 6          |
| MetaWRAP                  | 1        | 0        | 0        | 0        | 1         | 1         | 2          |
| MetaWRAP + BinSPreader    | 3        | <b>1</b> | 3        | <b>3</b> | 8         | 6         | 14         |
| MetaWRAP + BinSPreader-PE | <b>4</b> | <b>1</b> | <b>4</b> | <b>3</b> | <b>12</b> | <b>10</b> | <b>20</b>  |
| VAMB                      | 1        | <b>1</b> | 1        | 1        | 2         | 2         | 4          |
| VAMB + BinSPreader        | 3        | <b>1</b> | 3        | <b>3</b> | 8         | 6         | 14         |
| VAMB + BinSPreader-PE     | <b>4</b> | <b>1</b> | <b>4</b> | <b>3</b> | <b>12</b> | <b>10</b> | <b>20</b>  |
| VAMB + DAS Tool           | 1        | <b>1</b> | 1        | 1        | 2         | 2         | 4          |

Supplementary Table 17: Number of recovered rRNA genes in bins of the **Sharon** dataset depending on their completeness. The best results for each metrics are highlighted in bold. Related to section Results.
